# Supplementary material for: A simple and efficient synthesis of a series ofN-(thiazol-2-yl)piperidine-2,6-dione compounds and their interesting NLO properties
Source: Royal Society of Chemistry journal article supplement (doi:10.1039/d4ce00217b), 2024-01-01
Supplement: d4ce00217b1.pdf [file d4ce00217b1.pdf]

## Supporting Information

A simple and efficient synthesis of a series of N -(thiazol-2-yl)piperidine-2,6-dione  
compounds and their interesting NLO properties

Mayuri Shaiwale<sup>a</sup>, Narayan N. Som<sup>b, c</sup> Prafulla K Jha<sup>b</sup> and Amar Ballabh<sup>a</sup>

**Table 1:** Crystal data and CCDC number of compounds 1-5.

|                                    | <b>Compound-1</b>                                             | <b>Compound -2</b>                                             | <b>Compound -3</b>                                             | <b>Compound-4</b>                                               | <b>Compound -5</b>                                              |
|------------------------------------|---------------------------------------------------------------|----------------------------------------------------------------|----------------------------------------------------------------|-----------------------------------------------------------------|-----------------------------------------------------------------|
| Empirical formula                  | C <sub>8</sub> H <sub>8</sub> N <sub>2</sub> O <sub>2</sub> S | C <sub>9</sub> H <sub>10</sub> N <sub>2</sub> O <sub>2</sub> S | C <sub>9</sub> H <sub>10</sub> N <sub>2</sub> O <sub>2</sub> S | C <sub>10</sub> H <sub>12</sub> N <sub>2</sub> O <sub>2</sub> S | C <sub>12</sub> H <sub>10</sub> N <sub>2</sub> O <sub>2</sub> S |
| Formula weight                     | 196.22                                                        | 210.25                                                         | 210.25                                                         | 224.28                                                          | 246.28                                                          |
| Temperature/K                      | 293(2)                                                        | 293(2)                                                         | 293(2)                                                         | 293(2)                                                          | 293(2)                                                          |
| Crystal system                     | orthorhombic                                                  | orthorhombic                                                   | monoclinic                                                     | orthorhombic                                                    | orthorhombic                                                    |
| Space group                        | Fdd2                                                          | Pna2 <sub>1</sub>                                              | P2 <sub>1</sub> /c                                             | Pbca                                                            | Pbca                                                            |
| a/Å                                | 22.635(4)                                                     | 17.270(2)                                                      | 10.4402(13)                                                    | 11.0048(7)                                                      | 10.7717(9)                                                      |
| b/Å                                | 18.2458(18)                                                   | 6.5290(5)                                                      | 9.0667(12)                                                     | 9.1927(7)                                                       | 9.2453(9)                                                       |
| c/Å                                | 8.4549(12)                                                    | 8.7853(8)                                                      | 10.6841(15)                                                    | 21.2407(14)                                                     | 23.0901(14)                                                     |
| α/°                                | 90                                                            | 90                                                             | 90                                                             | 90                                                              | 90                                                              |
| β/°                                | 90                                                            | 90                                                             | 103.828(12)                                                    | 90                                                              | 90                                                              |
| γ/°                                | 90                                                            | 90                                                             | 90                                                             | 90                                                              | 90                                                              |
| Volume/Å <sup>3</sup>              | 3491.9(8)                                                     | 990.61(16)                                                     | 982.0(2)                                                       | 2148.8(2)                                                       | 2299.5(3)                                                       |
| Z                                  | 16                                                            | 4                                                              | 4                                                              | 8                                                               | 8                                                               |
| ρ <sub>calc</sub> /cm <sup>3</sup> | 1.493                                                         | 1.410                                                          | 1.422                                                          | 1.387                                                           | 1.423                                                           |
| μ/mm <sup>-1</sup>                 | 0.336                                                         | 0.301                                                          | 0.304                                                          | 0.282                                                           | 0.272                                                           |
| F(000)                             | 1632.0                                                        | 440.0                                                          | 440.0                                                          | 944.0                                                           | 1024.0                                                          |
| Crystal size/mm <sup>3</sup>       | 0.98 × 0.26 × 0.243                                           | 0.94 × 0.79 × 0.6                                              | 1.47 × 0.8 × 0.447                                             | 1.177 × 0.683 × 0.301                                           | 1.26 × 0.693 × 0.346                                            |

| Radiation                                        | Mo K $\alpha$ ( $\lambda = 0.71073$ )                             | Mo K $\alpha$ ( $\lambda = 0.71073$ )                            | Mo K $\alpha$ ( $\lambda = 0.71073$ )                             | Mo K $\alpha$ ( $\lambda = 0.71073$ )                              | Mo K $\alpha$ ( $\lambda = 0.71073$ )                              |
|--------------------------------------------------|-------------------------------------------------------------------|------------------------------------------------------------------|-------------------------------------------------------------------|--------------------------------------------------------------------|--------------------------------------------------------------------|
| 2 $\Theta$ range for data collection/ $^{\circ}$ | 7.2 to 57.668                                                     | 6.672 to 57.672                                                  | 7.704 to 52.74                                                    | 6.94 to 58.04                                                      | 6.796 to 52.744                                                    |
| Index ranges                                     | $-26 \leq h \leq 28$ , $-16 \leq k \leq 24$ , $-11 \leq l \leq 4$ | $-23 \leq h \leq 18$ , $-7 \leq k \leq 8$ , $-6 \leq l \leq 11$  | $-13 \leq h \leq 12$ , $-11 \leq k \leq 9$ , $-13 \leq l \leq 12$ | $-13 \leq h \leq 14$ , $-12 \leq k \leq 12$ , $-25 \leq l \leq 29$ | $-13 \leq h \leq 12$ , $-11 \leq k \leq 11$ , $-28 \leq l \leq 28$ |
| Reflections collected                            | 2347                                                              | 3049                                                             | 3834                                                              | 7976                                                               | 12129                                                              |
| Independent reflections                          | 1290 [ $R_{\text{int}} = 0.0159$ , $R_{\text{sigma}} = 0.0232$ ]  | 1505 [ $R_{\text{int}} = 0.0140$ , $R_{\text{sigma}} = 0.0189$ ] | 1982 [ $R_{\text{int}} = 0.0148$ , $R_{\text{sigma}} = 0.0237$ ]  | 2104 [ $R_{\text{int}} = 0.0321$ , $R_{\text{sigma}} = 0.0459$ ]   | 2321 [ $R_{\text{int}} = 0.0331$ , $R_{\text{sigma}} = 0.0270$ ]   |
| Data/restraints/parameters                       | 1290/1/118                                                        | 1505/1/128                                                       | 1982/0/138                                                        | 2104/0/139                                                         | 2321/0/187                                                         |
| Goodness-of-fit on $F^2$                         | 0.961                                                             | 1.075                                                            | 1.060                                                             | 1.022                                                              | 0.715                                                              |
| Final R indexes [ $I \geq 2\sigma(I)$ ]          | $R_1 = 0.0347$ , $wR_2 = 0.1099$                                  | $R_1 = 0.0412$ , $wR_2 = 0.1136$                                 | $R_1 = 0.0367$ , $wR_2 = 0.0924$                                  | $R_1 = 0.0460$ , $wR_2 = 0.1040$                                   | $R_1 = 0.0525$ , $wR_2 = 0.1553$                                   |
| Final R indexes [all data]                       | $R_1 = 0.0379$ , $wR_2 = 0.1158$                                  | $R_1 = 0.0448$ , $wR_2 = 0.1164$                                 | $R_1 = 0.0468$ , $wR_2 = 0.0989$                                  | $R_1 = 0.0671$ , $wR_2 = 0.1155$                                   | $R_1 = 0.0699$ , $wR_2 = 0.1783$                                   |
| Largest diff. peak/hole / $e \text{ \AA}^{-3}$   | 0.16/-0.16                                                        | 0.48/-0.41                                                       | 0.19/-0.22                                                        | 0.46/-0.15                                                         | 0.37/-0.21                                                         |
| Flack parameter                                  | 0.32(13)                                                          | 0.18(6)                                                          |                                                                   |                                                                    |                                                                    |
| CCDC Number                                      | 1560120                                                           | 1561181                                                          | 2062131                                                           | 2062127                                                            | 1561183                                                            |

| Table 2: Geometries of hydrogen bond in <b>Compound-1</b> to <b>compound-5</b> |     |      |                 |            |            |            |           |                                  |
|--------------------------------------------------------------------------------|-----|------|-----------------|------------|------------|------------|-----------|----------------------------------|
|                                                                                | D   | H    | A               | d(D...H)/Å | d(H...A)/Å | d(D...A)/Å | D-H...A/° | Symmetry operation for A         |
| <b>Compound-1</b>                                                              | C7  | H7A  | O1 <sup>1</sup> | 0.97       | 2.47       | 3.222 (4)  | 133.8     | <sup>1</sup> -7/4-X,1/4+Y,1/4+Z; |
|                                                                                | C5  | H5A  | O1 <sup>1</sup> | 0.97       | 2.48       | 3.234 (4)  | 134.6     |                                  |
|                                                                                | C3  | H3   | N1 <sup>2</sup> | 0.93       | 2.56       | 3.224 (4)  | 129.0     | <sup>2</sup> -7/4-X,-1/4+Y,-1/4+ |
| <b>Compound-2</b>                                                              | C2  | H2   | O2 <sup>1</sup> | 0.93       | 2.62       | 3.416 (5)  | 143.7     | <sup>1</sup> 3/2-X,-1/2+Y,1/2+Z  |
|                                                                                | C4  | H4B  | O2 <sup>1</sup> | 0.96       | 2.57       | 3.412 (6)  | 146.0     |                                  |
| <b>Compound-3</b>                                                              | C8  | H8B  | N1 <sup>1</sup> | 0.97       | 2.54       | 3.399 (2)  | 147.1     | <sup>1</sup> 2-X,1-Y,2-Z;        |
|                                                                                | C2  | H2   | O1 <sup>2</sup> | 0.93       | 2.56       | 3.084 (2)  | 115.7     | <sup>2</sup> 1-X,1/2+Y,3/2-Z;    |
|                                                                                | C4  | H4B  | O1 <sup>3</sup> | 0.96 (4)   | 2.62 (4)   | 3.562 (3)  | 168 (3)   | <sup>3</sup> +X,1/2-Y,-1/2+Z     |
| <b>Compound-4</b>                                                              | C9  | H9A  | O1 <sup>1</sup> | 0.97       | 2.56       | 3.433 (3)  | 150.1     | <sup>1</sup> 1/2+X,+Y,3/2-Z;     |
|                                                                                | C4  | H4A  | O1 <sup>2</sup> | 0.96       | 2.55       | 3.436 (3)  | 153.2     | <sup>2</sup> -X,-Y,1-Z           |
| <b>Compound-5</b>                                                              | C9  | H9B  | O2 <sup>1</sup> | 0.93 (5)   | 2.45 (5)   | 3.281 (4)  | 148 (4)   | <sup>1</sup> 1-X,-1/2+Y,3/2-Z;   |
|                                                                                | C11 | H11C | O1 <sup>2</sup> | 1.40 (6)   | 2.65 (6)   | 3.538 (5)  | 119 (4)   | <sup>2</sup> 1/2+X,+Y,3/2-Z      |

**Table 3:** SHG experimental data of compounds 1-5.

| Compound Info.                 | Compound 1<br>(2-AT)<br>M.F.:C <sub>8</sub> H <sub>8</sub> N <sub>2</sub> O <sub>2</sub> S<br>CCDC: 1560120<br>Fdd <sub>2</sub> | Compound 2<br>(2-AT-5-Me)<br>M.F.:C <sub>9</sub> H <sub>10</sub> N <sub>2</sub> O <sub>2</sub> S<br>CCDC: 1561181<br>Pna2 <sub>1</sub> | Compound 3<br>(2-AT-4-Me)<br>M.F.:C <sub>9</sub> H <sub>10</sub> N <sub>2</sub> O <sub>2</sub> S<br>CCDC: 2062131<br>P2 <sub>1</sub> /c | Compound 4<br>(2-AT-4,5-Dime)<br>M.F.:C <sub>10</sub> H <sub>12</sub> N <sub>2</sub> O <sub>2</sub> S<br>CCDC: 2062127<br>Pbca | Compound 5<br>(2-AT-Phenyl)<br>M.F.:C <sub>12</sub> H <sub>10</sub> N <sub>2</sub> O <sub>2</sub> S<br>CCDC: 1561183<br>Pbca |
|--------------------------------|---------------------------------------------------------------------------------------------------------------------------------|----------------------------------------------------------------------------------------------------------------------------------------|-----------------------------------------------------------------------------------------------------------------------------------------|--------------------------------------------------------------------------------------------------------------------------------|------------------------------------------------------------------------------------------------------------------------------|
| NLO-Second Harmonic generation | 192 mV<br><br>3.05> Urea<br><br>6.62> KDP                                                                                       | 60mV<br><br>0.95> Urea<br><br>2.07> KDP                                                                                                | 10 mV<br><br>0.3 > Urea<br><br>= KDP                                                                                                    | 25 mV<br><br>0.5> Urea<br><br>1.13> KDP                                                                                        | 10mV<br><br>0.3 > Urea<br><br>= KDP                                                                                          |

**Table 4 :** % Contribution of various non-covalent interactions in Compound-1to Compound-5 (calculated using Hirshfeld surface analysis)

| %                  | C-H | H-C | C-O | O-C | C-N | N-C | C-S | S-C | S-N | N-S | N-O | O-N | C-C | O-O | H-H  | O-H  | H-O  | H-S | S-H | O-S | S-O | H-N | N-H |
|--------------------|-----|-----|-----|-----|-----|-----|-----|-----|-----|-----|-----|-----|-----|-----|------|------|------|-----|-----|-----|-----|-----|-----|
| Compounds          |     |     |     |     |     |     |     |     |     |     |     |     |     |     |      |      |      |     |     |     |     |     |     |
| <b>2-AT</b>        | 4.0 | 3.1 | 1.0 | 0.8 | 0.7 | 0.7 | 0.3 | 0.3 | 0.2 | 0.1 | 0.7 | 0.7 | 1.1 | 0.3 | 27.6 | 15.5 | 13.6 | 5.2 | 9.0 | 1.2 | 1.6 | 5.5 | 6.9 |
| <b>2-A-5-MT</b>    | 5.1 | 4.1 | 0.7 | 0.7 | 0.0 | 0.0 | 0.0 | 0.1 | 0.0 | 0.0 | 0.6 | 0.6 | 0.0 | 0.4 | 36.2 | 13.8 | 11.2 | 3.5 | 6.7 | 1.5 | 2.1 | 5.4 | 7.1 |
| <b>2-A-4-MT</b>    | 5.1 | 4.2 | 0.4 | 0.3 | 0.0 | 0.0 | 0.0 | 0.0 | 0.0 | 0.0 | 0.0 | 0.0 | 0.7 | 1.0 | 34.0 | 14.4 | 11.8 | 4.5 | 8.9 | 1.1 | 1.7 | 5.3 | 6.5 |
| <b>2-A-4,5-DMT</b> | 3.6 | 2.9 | 0.7 | 0.6 | 0.0 | 0.0 | 0.7 | 0.7 | 0.7 | 0.6 | 0.5 | 0.3 | 0.3 | 0.1 | 42.7 | 13.8 | 11.5 | 3.4 | 6.1 | 0.7 | 1.0 | 4.0 | 5.2 |
| <b>2-ABT</b>       | 9.9 | 7.9 | 0.5 | 0.5 | 0.0 | 0.0 | 1.4 | 1.4 | 0.7 | 0.5 | 0.4 | 0.3 | 4.4 | 0.5 | 30.0 | 12.0 | 10.0 | 3.2 | 5.5 | 0.8 | 1.1 | 3.9 | 5.1 |

# Physico-Chemical Characterization of Compounds 1-5

Data of Compound -1: Piperidine-2, 6-dione derivative of 2-Aminothiazole

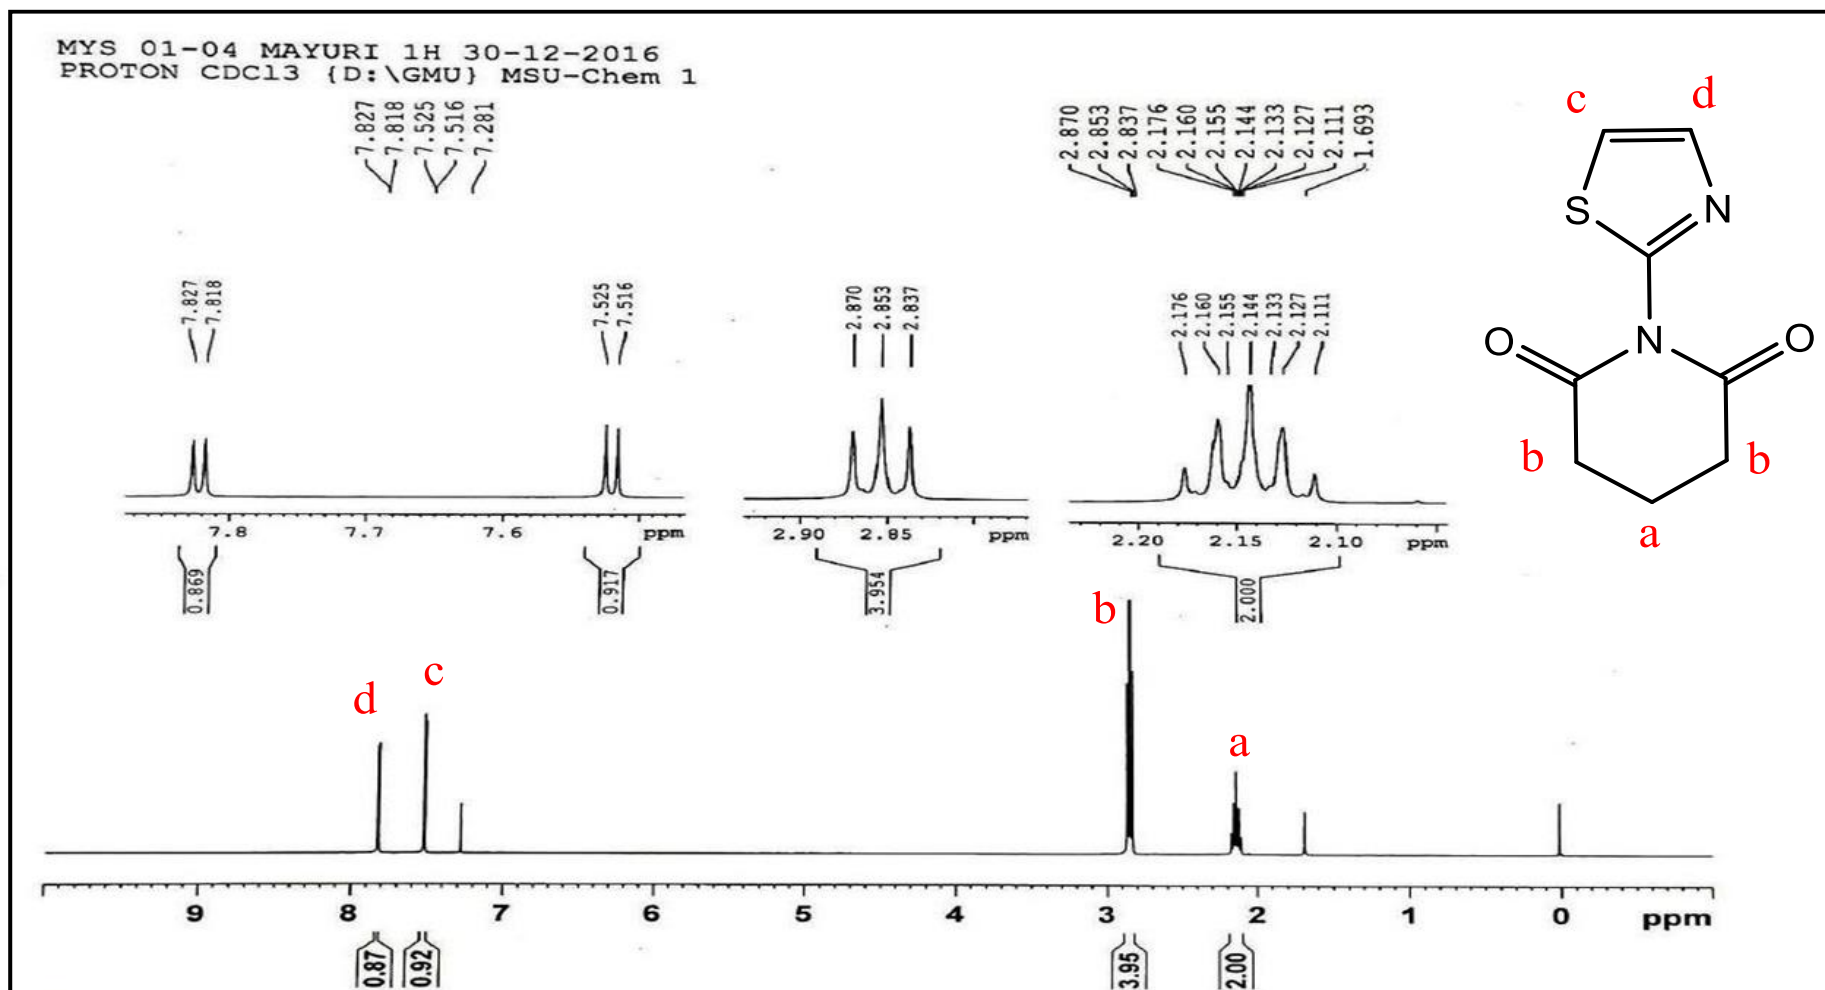

MYS 01-04 MAYURI 13C 30-12-2016  
C13CPD CDCl3 {D:\GMU} MSU-Chem 1

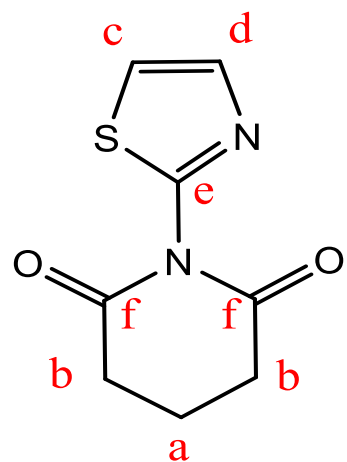

171.94

155.28

141.13

122.41

77.38

77.06

76.75

32.86

16.87

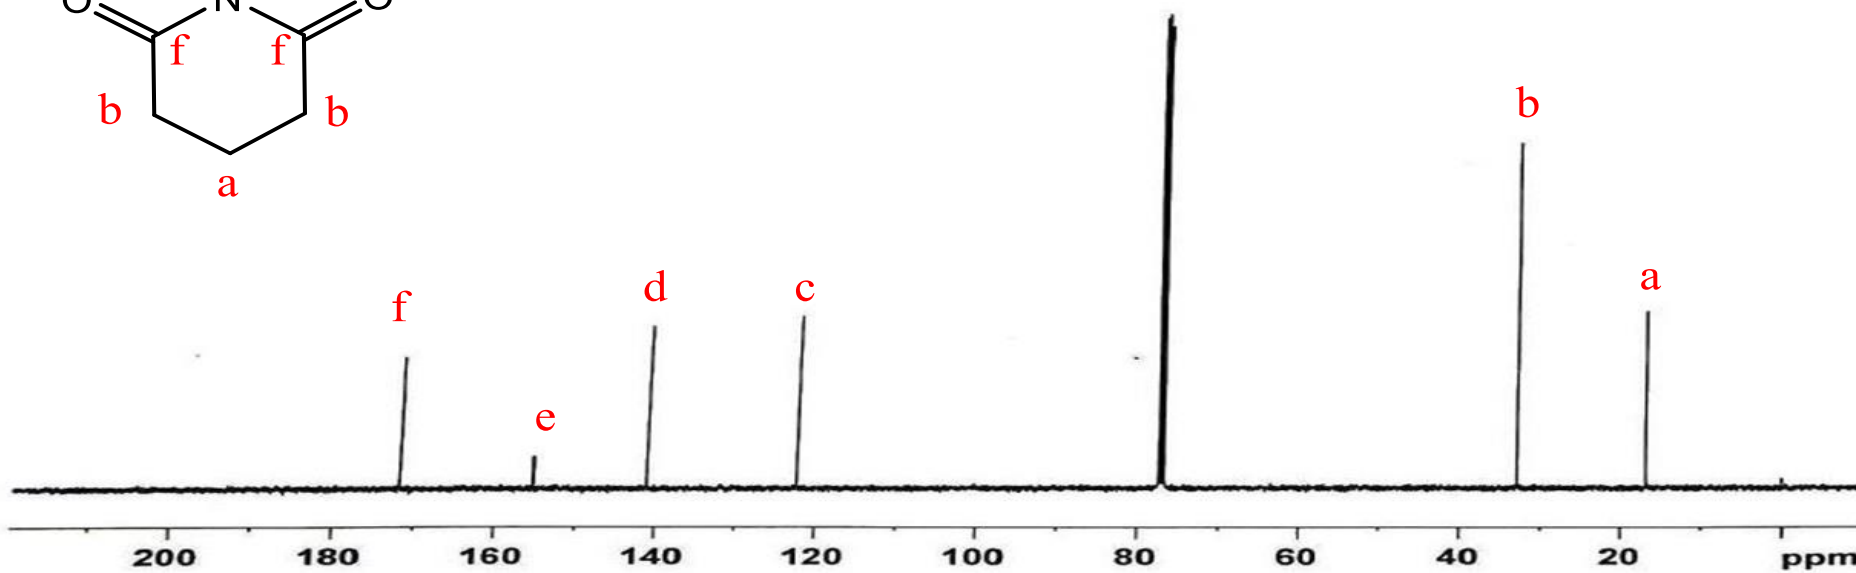

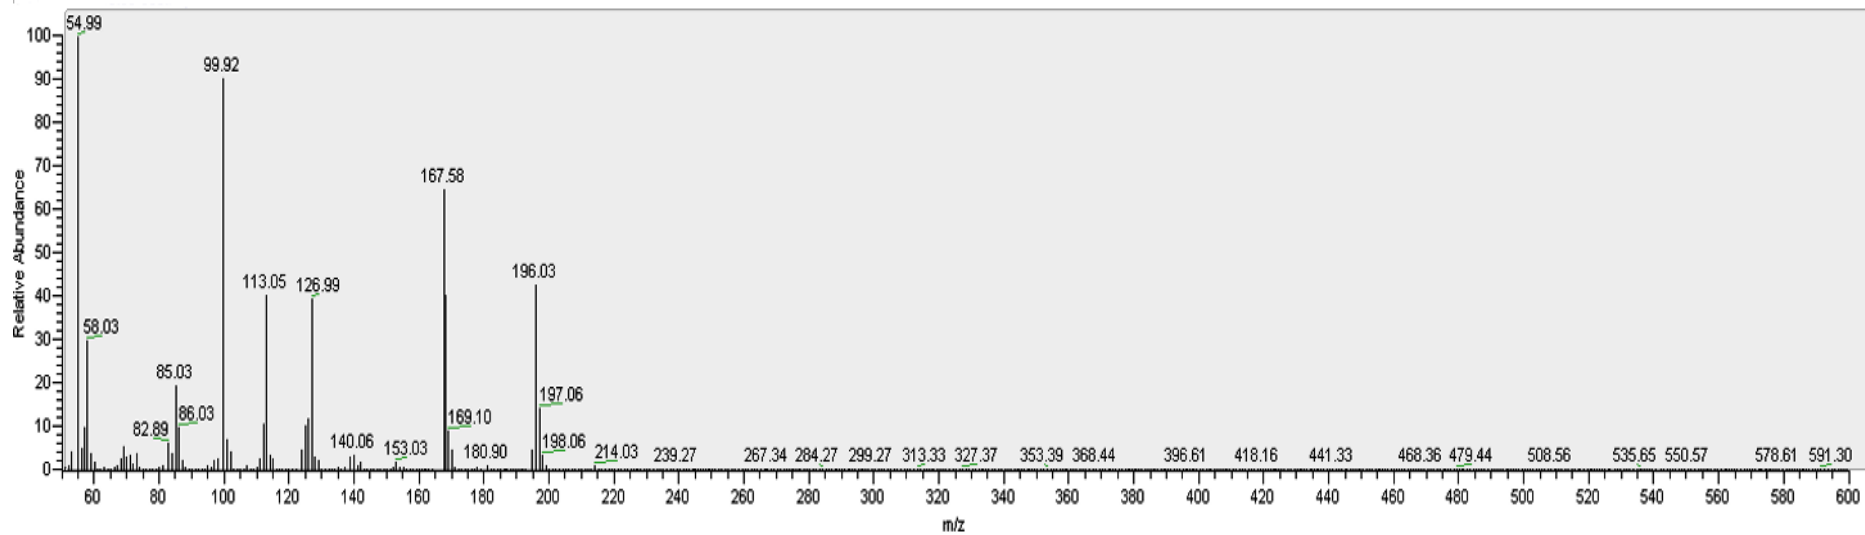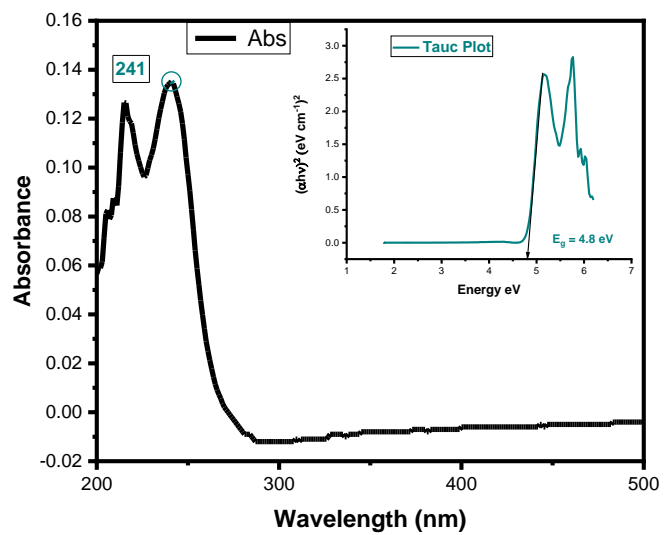



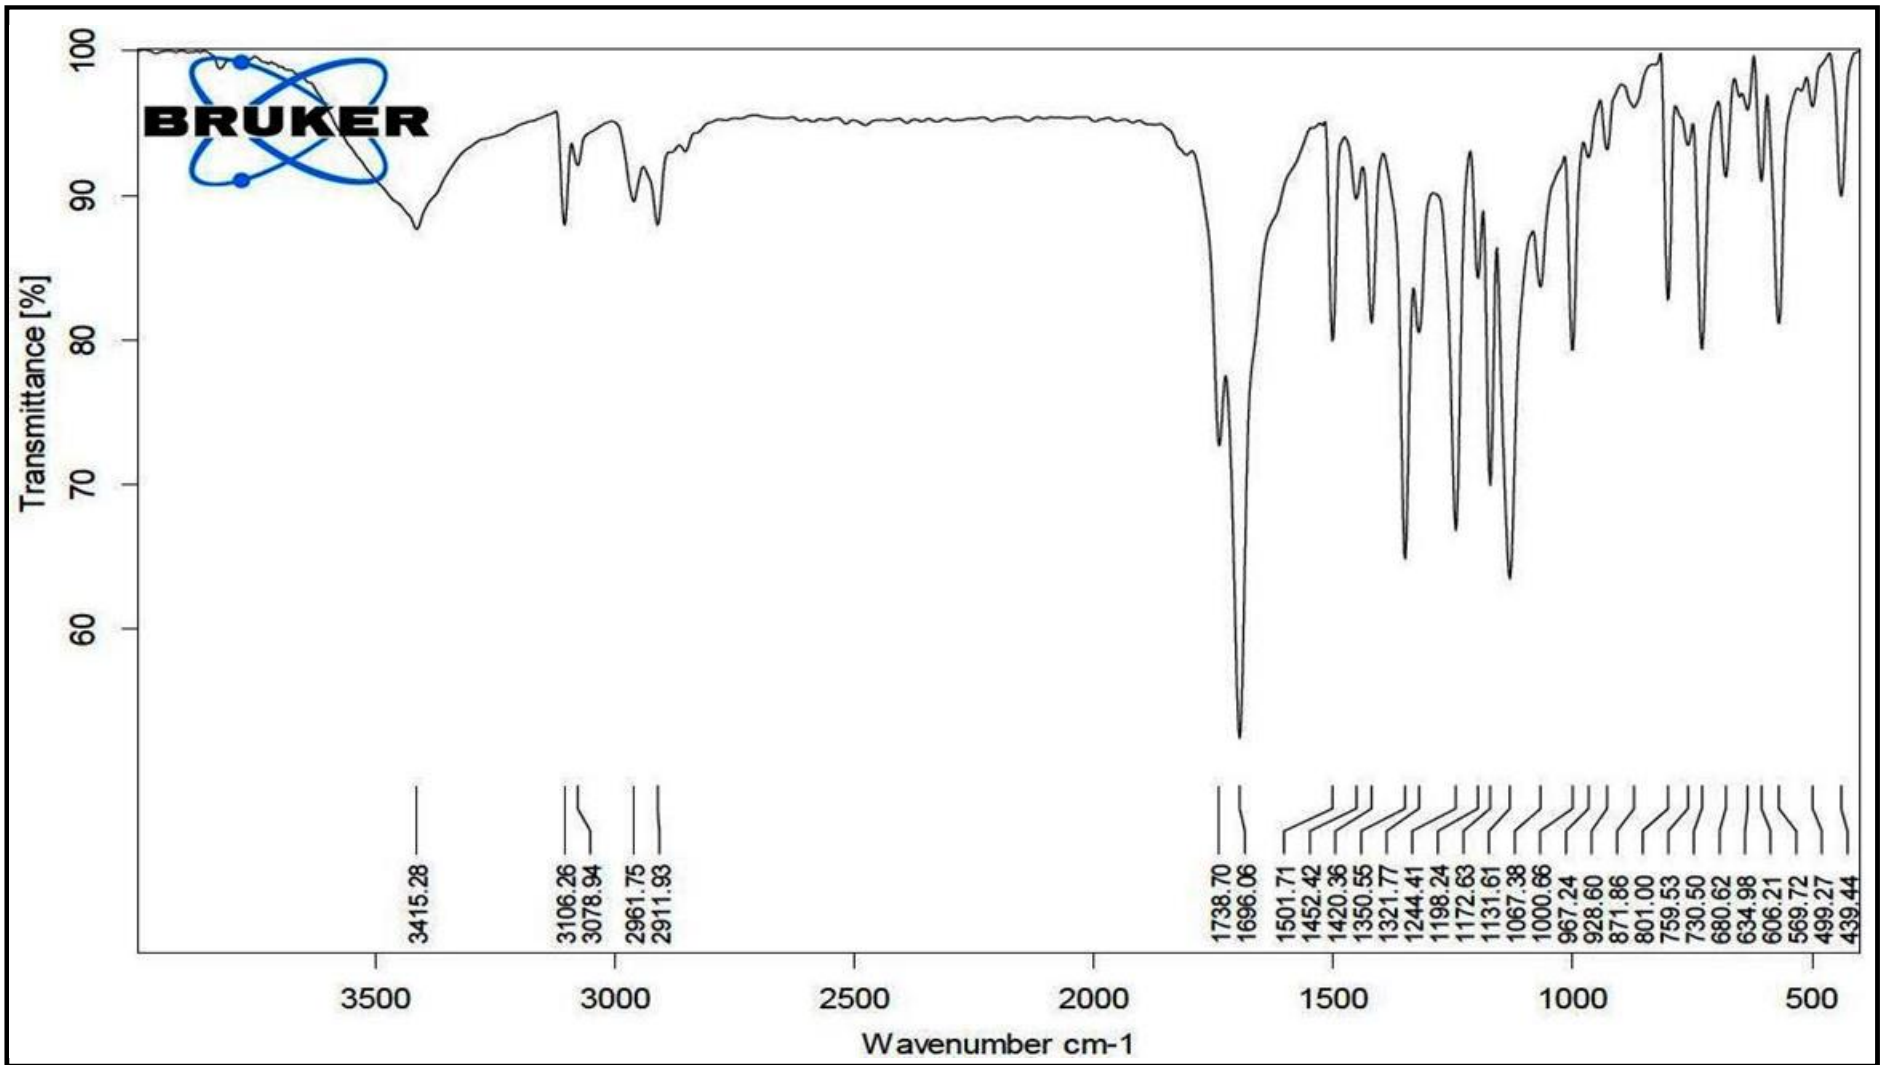

# Compound 1: Hirschfeld fingerprint graph and % contribution of weak interactions

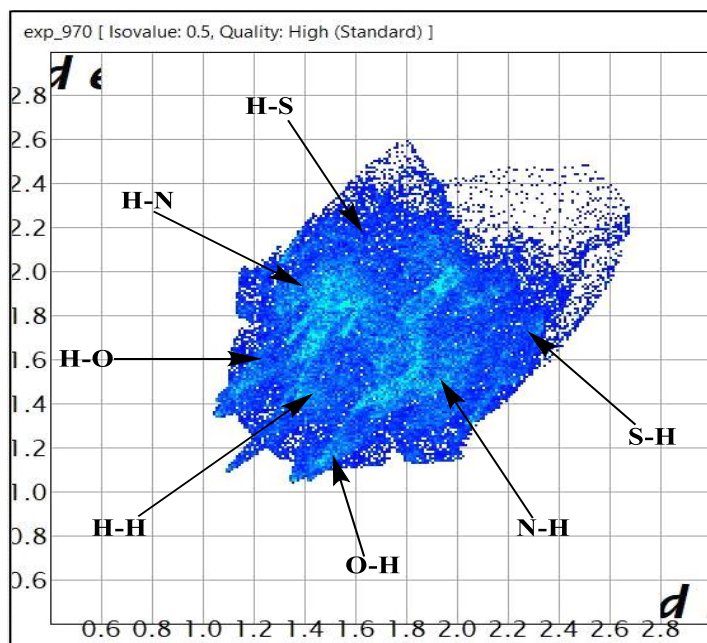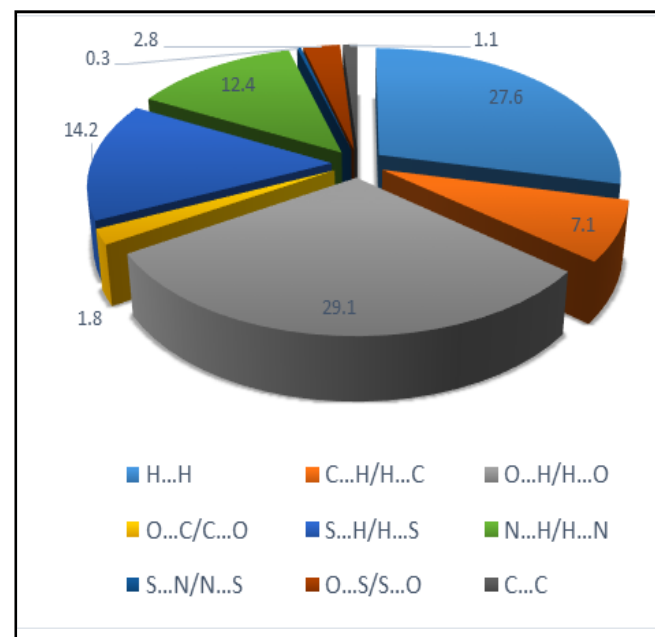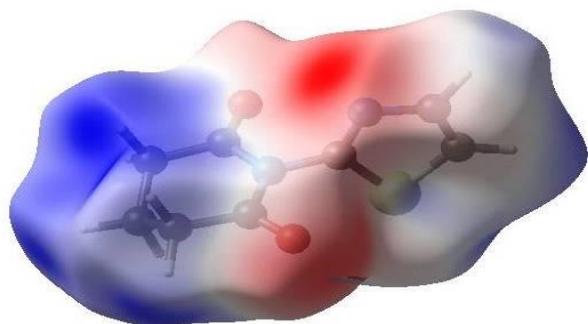

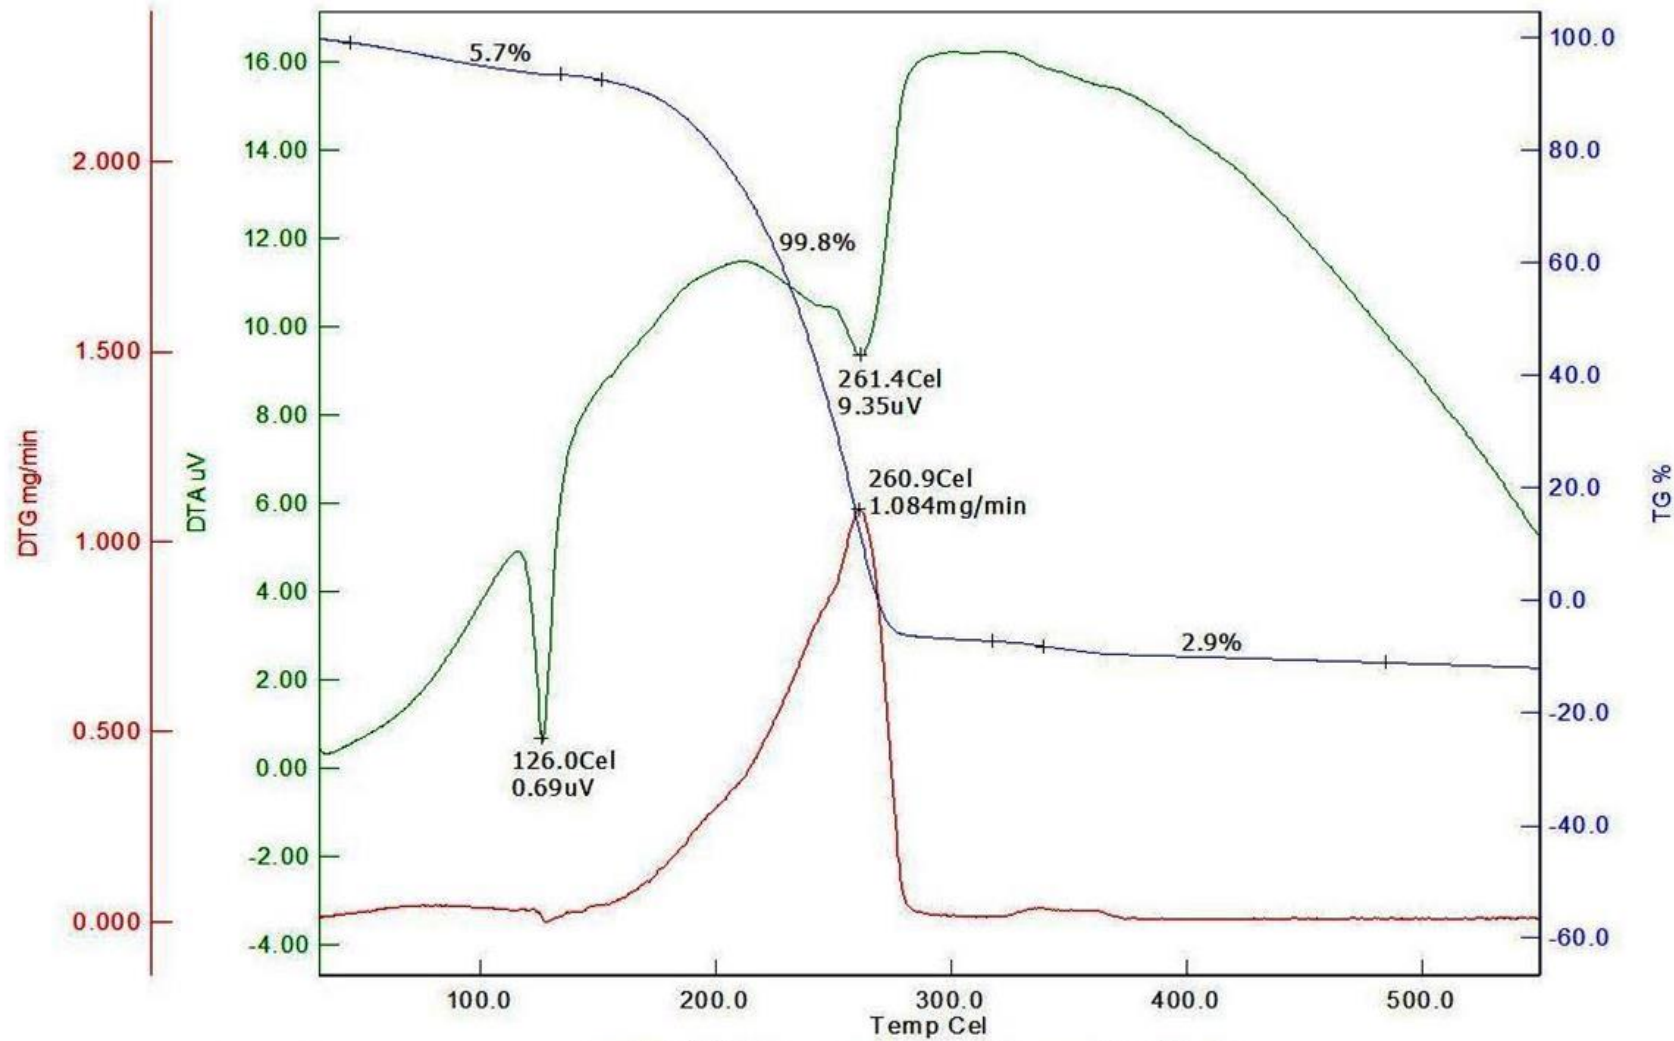

Data of Compound -2: 2-Amino-5-methylthiazole derivative

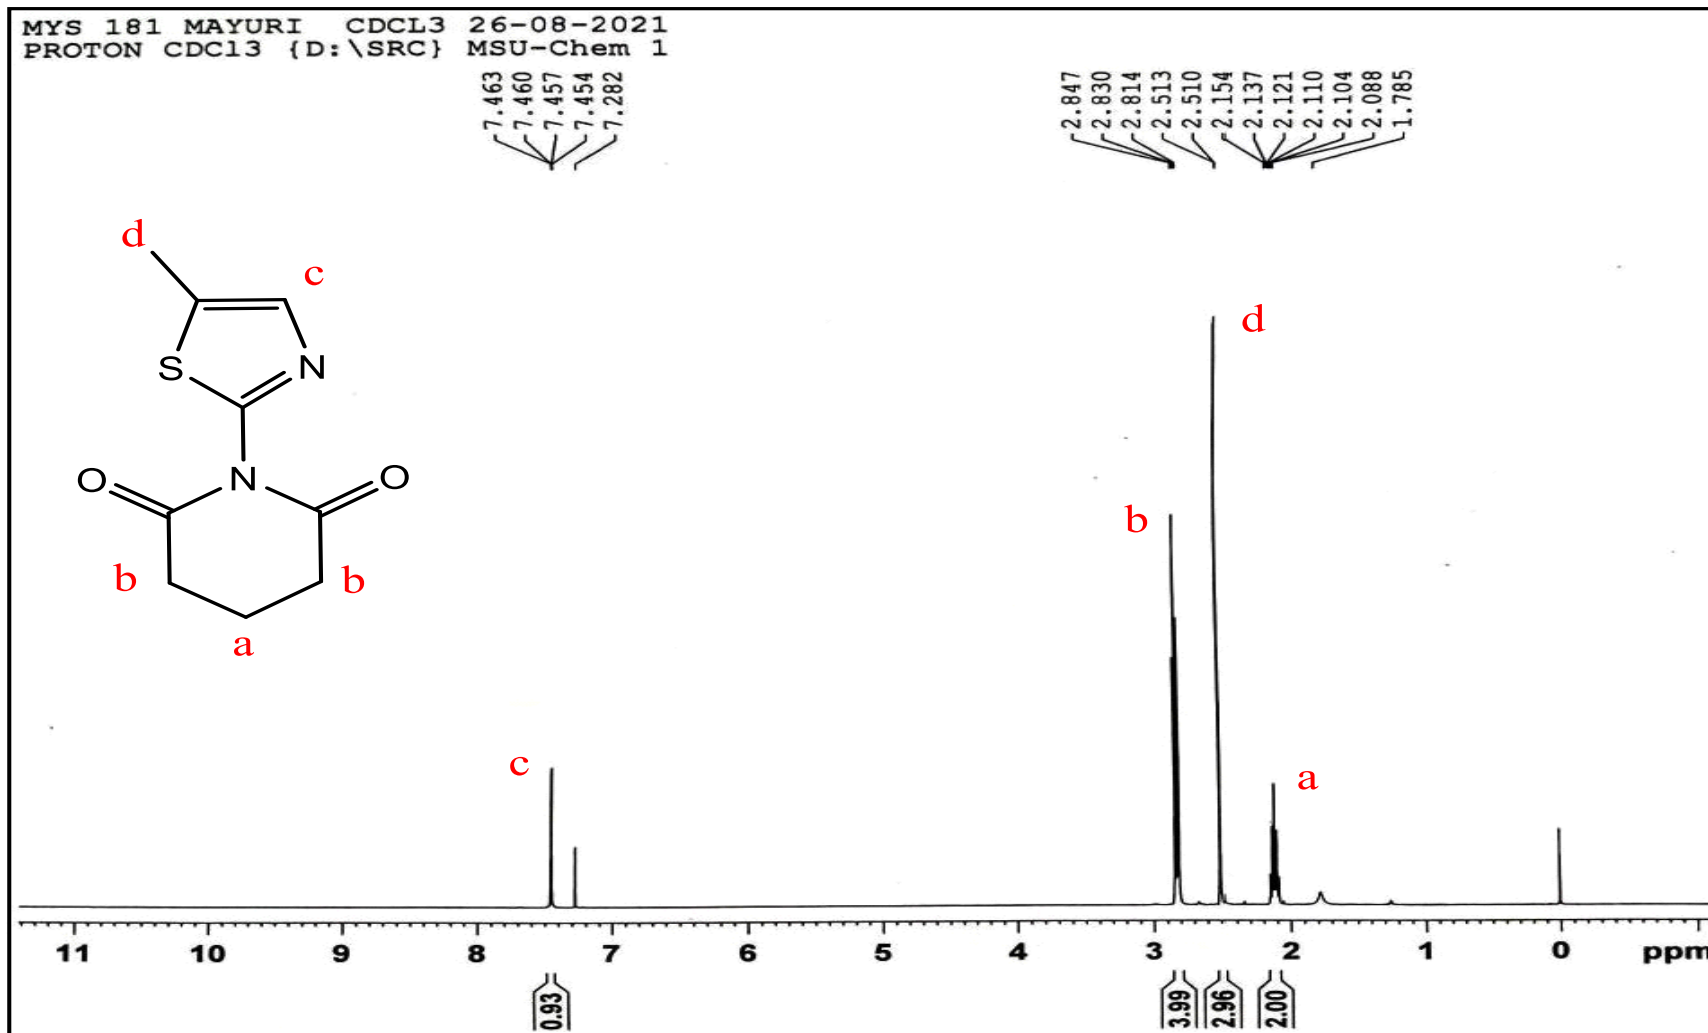

MYS 181 MAYURI CDCL3 26-08-2021  
C13CPD CDCL3 {D:\SRC} MSU-Chem 1

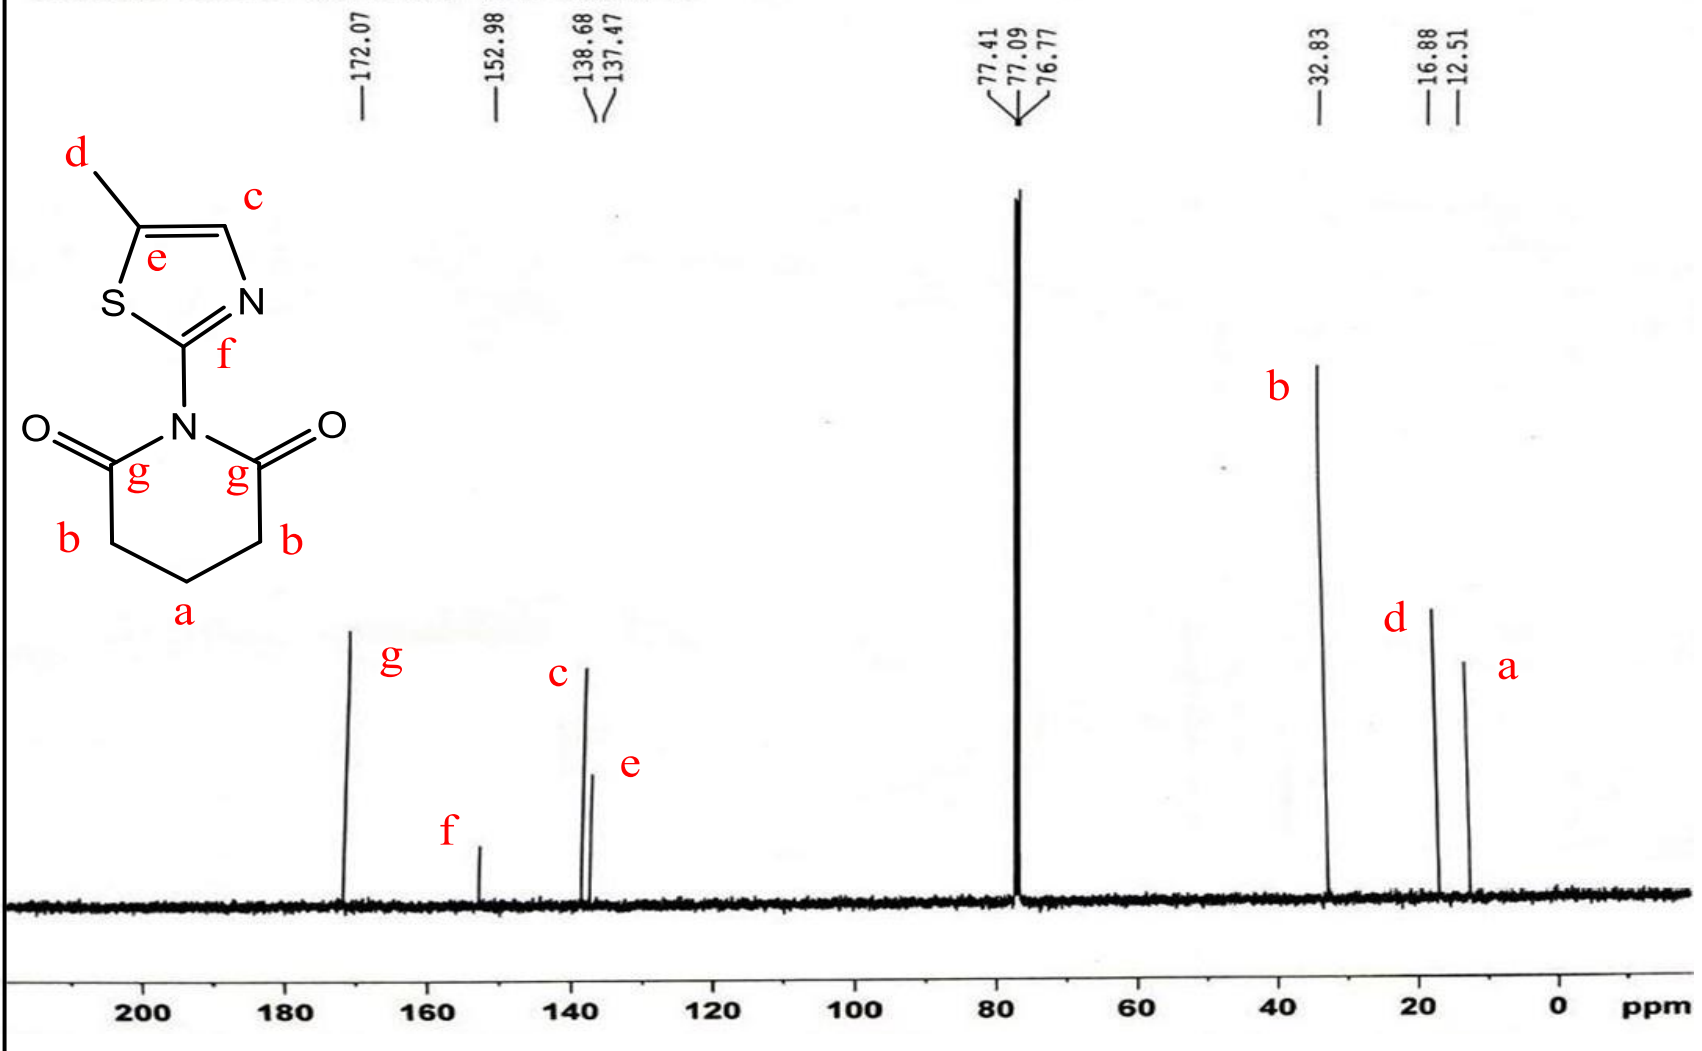

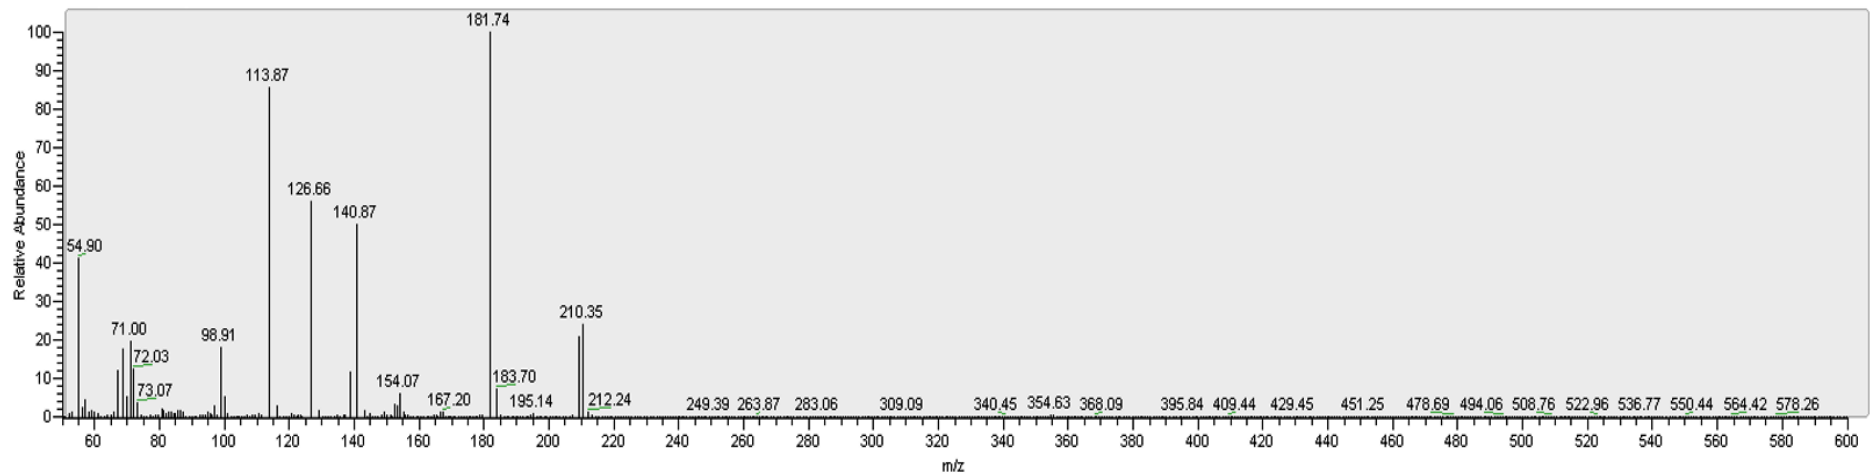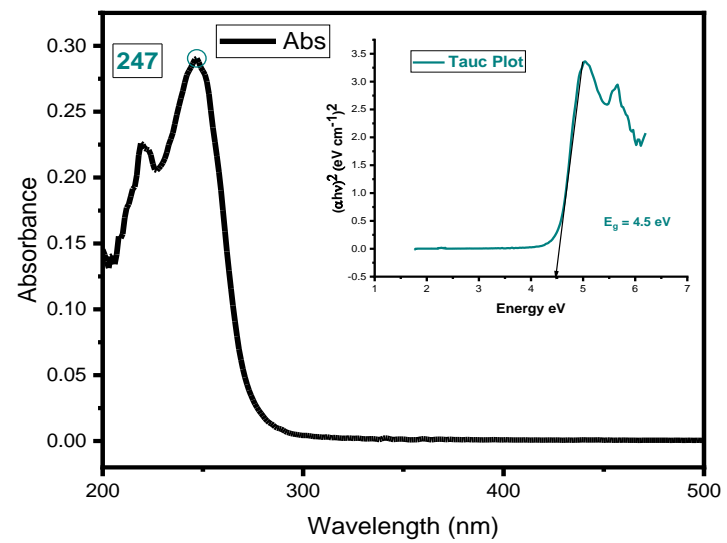

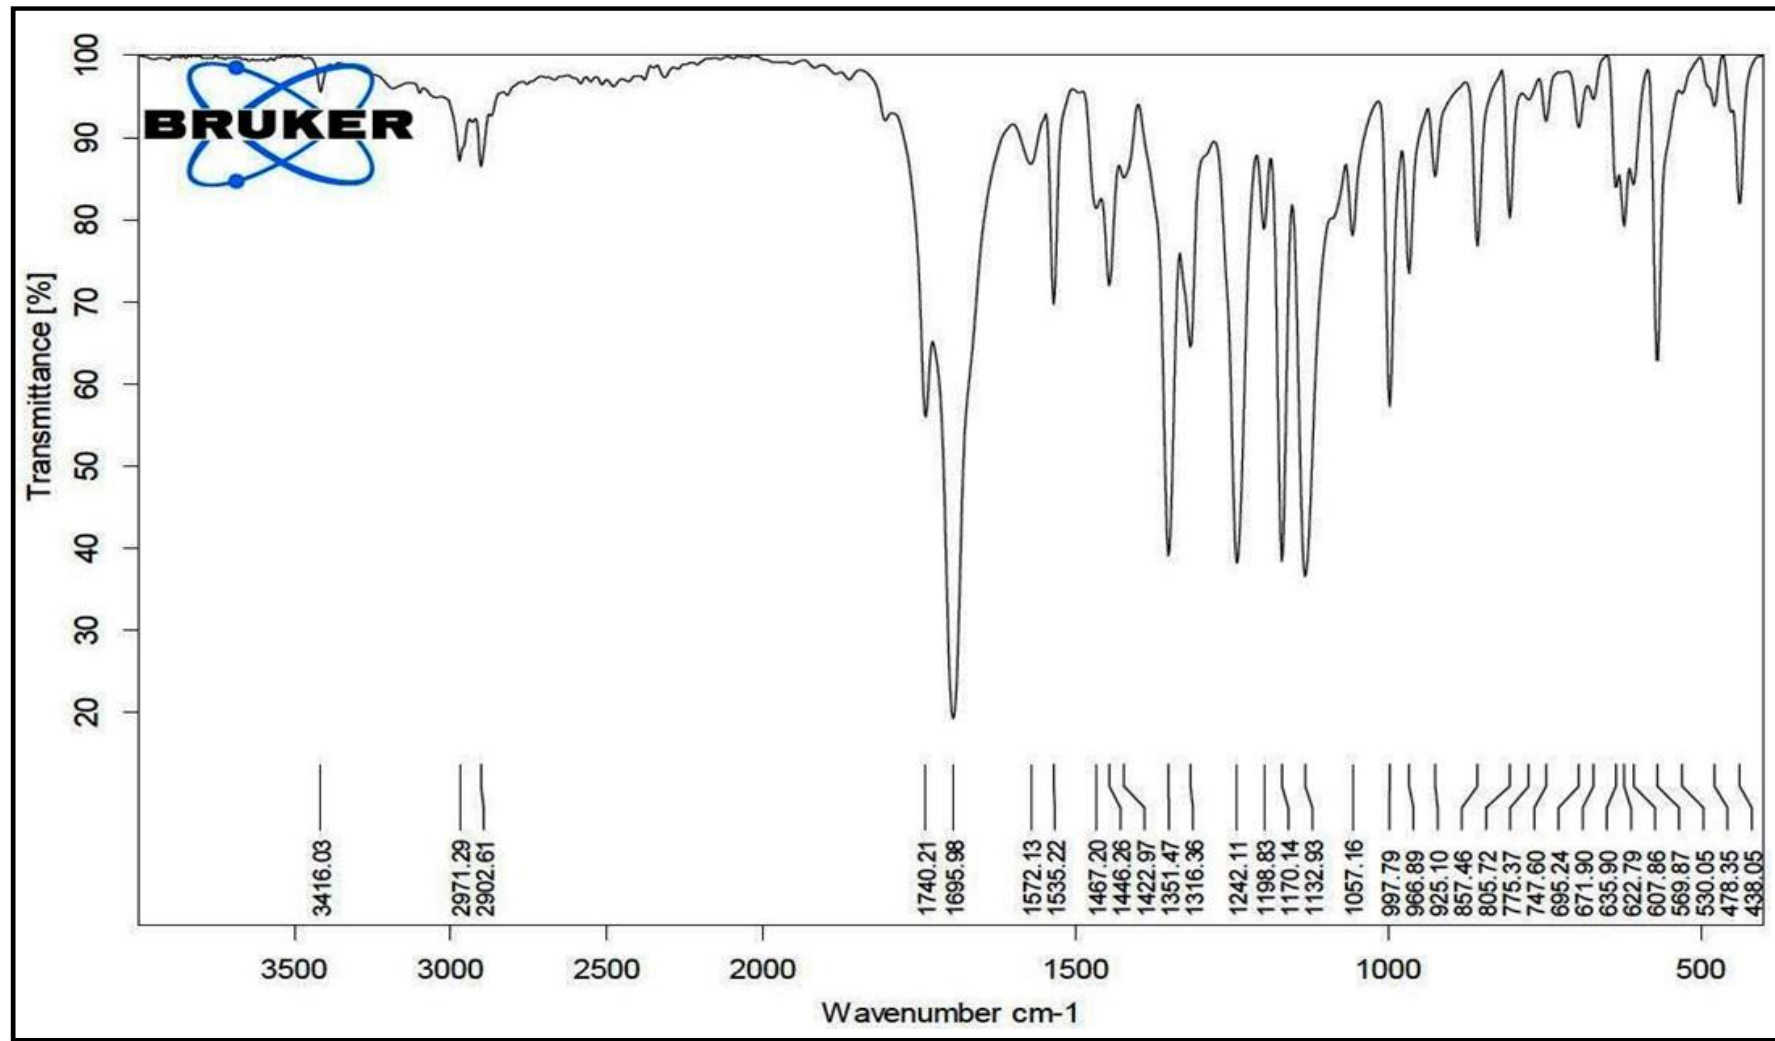

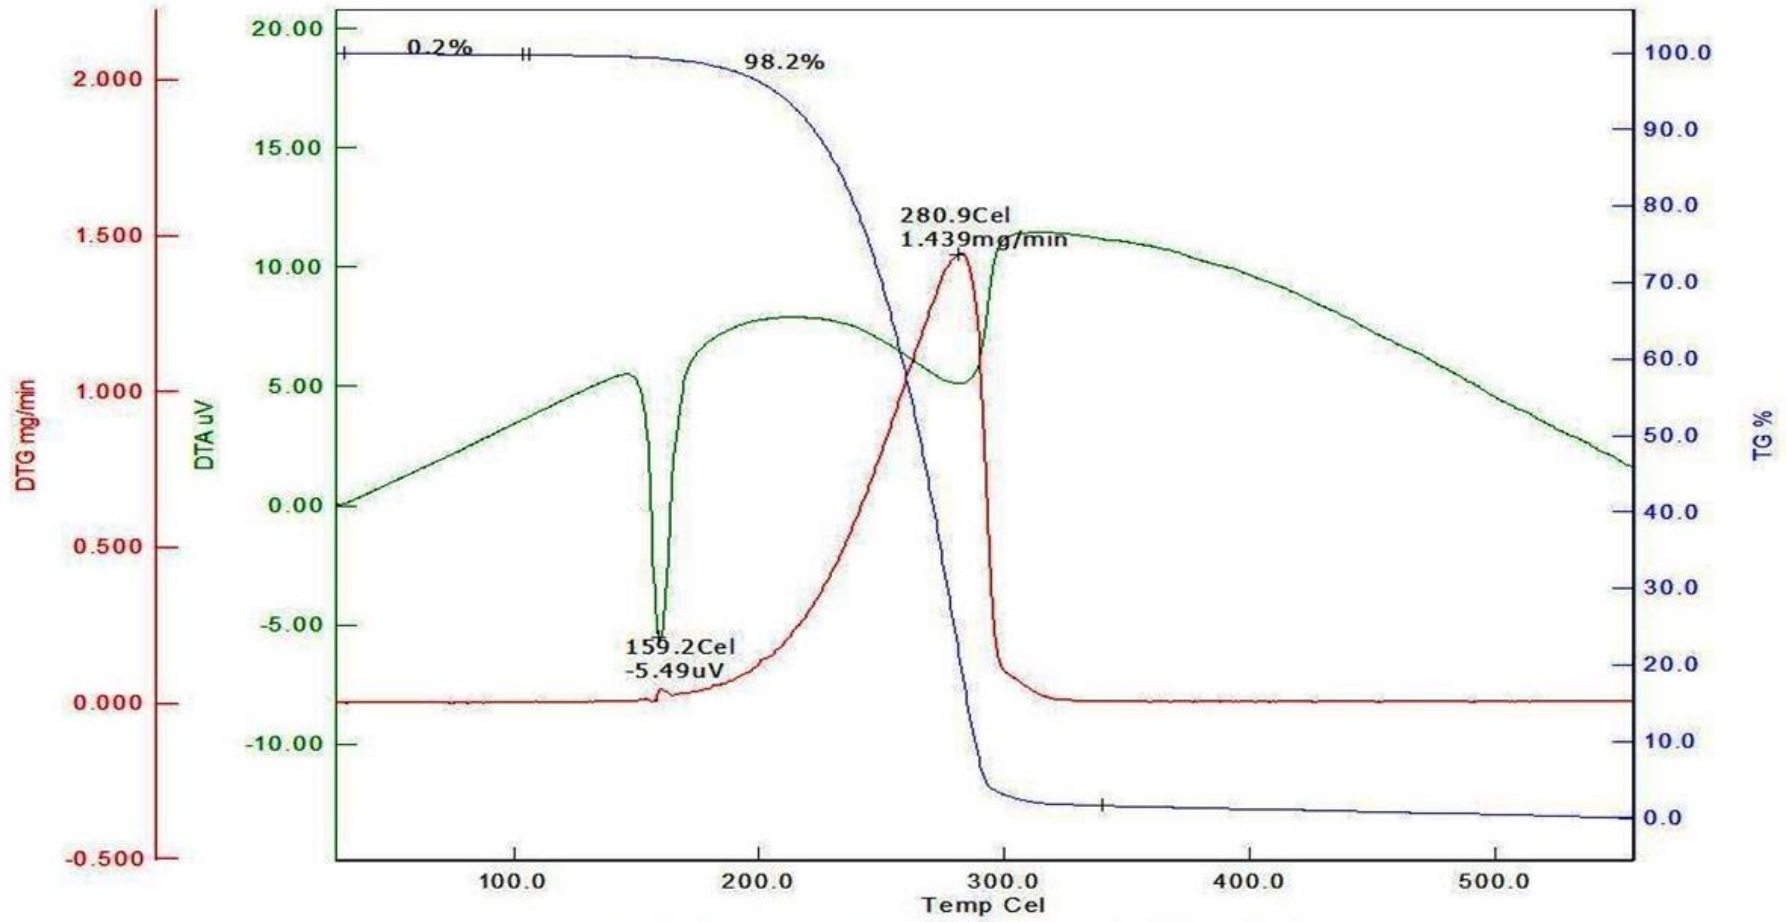

Maharaja Sayajirao University of Baroda

— MYS 142 DTA    — MYS 142 DTG    — MYS 142 TG



2-A-5MT product: Hirschfeld fingerprint graph and % contribution of weak interactions

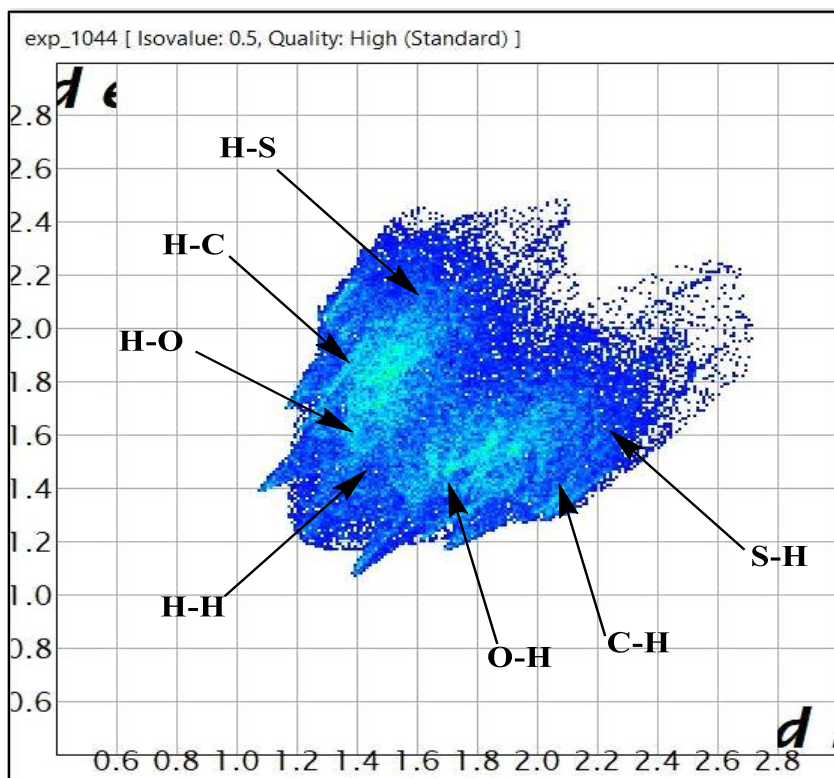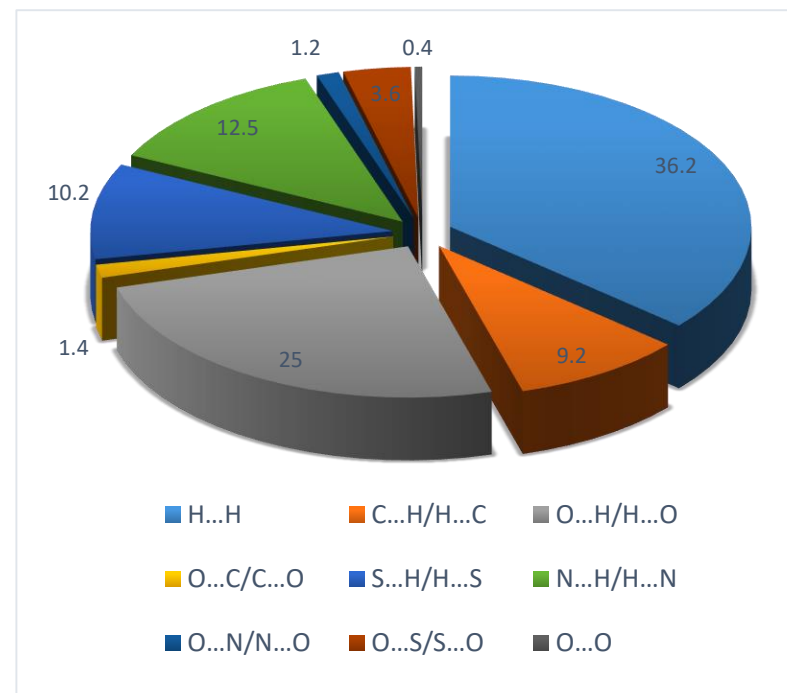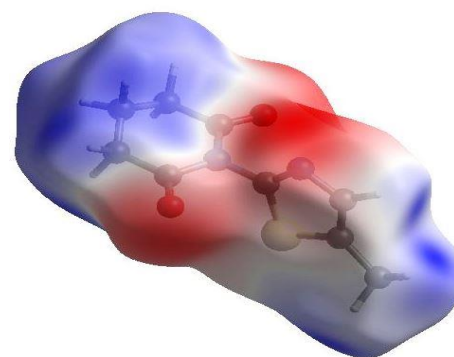

Data of Compound -3: 2-Amino-4-methylthiazole derivative

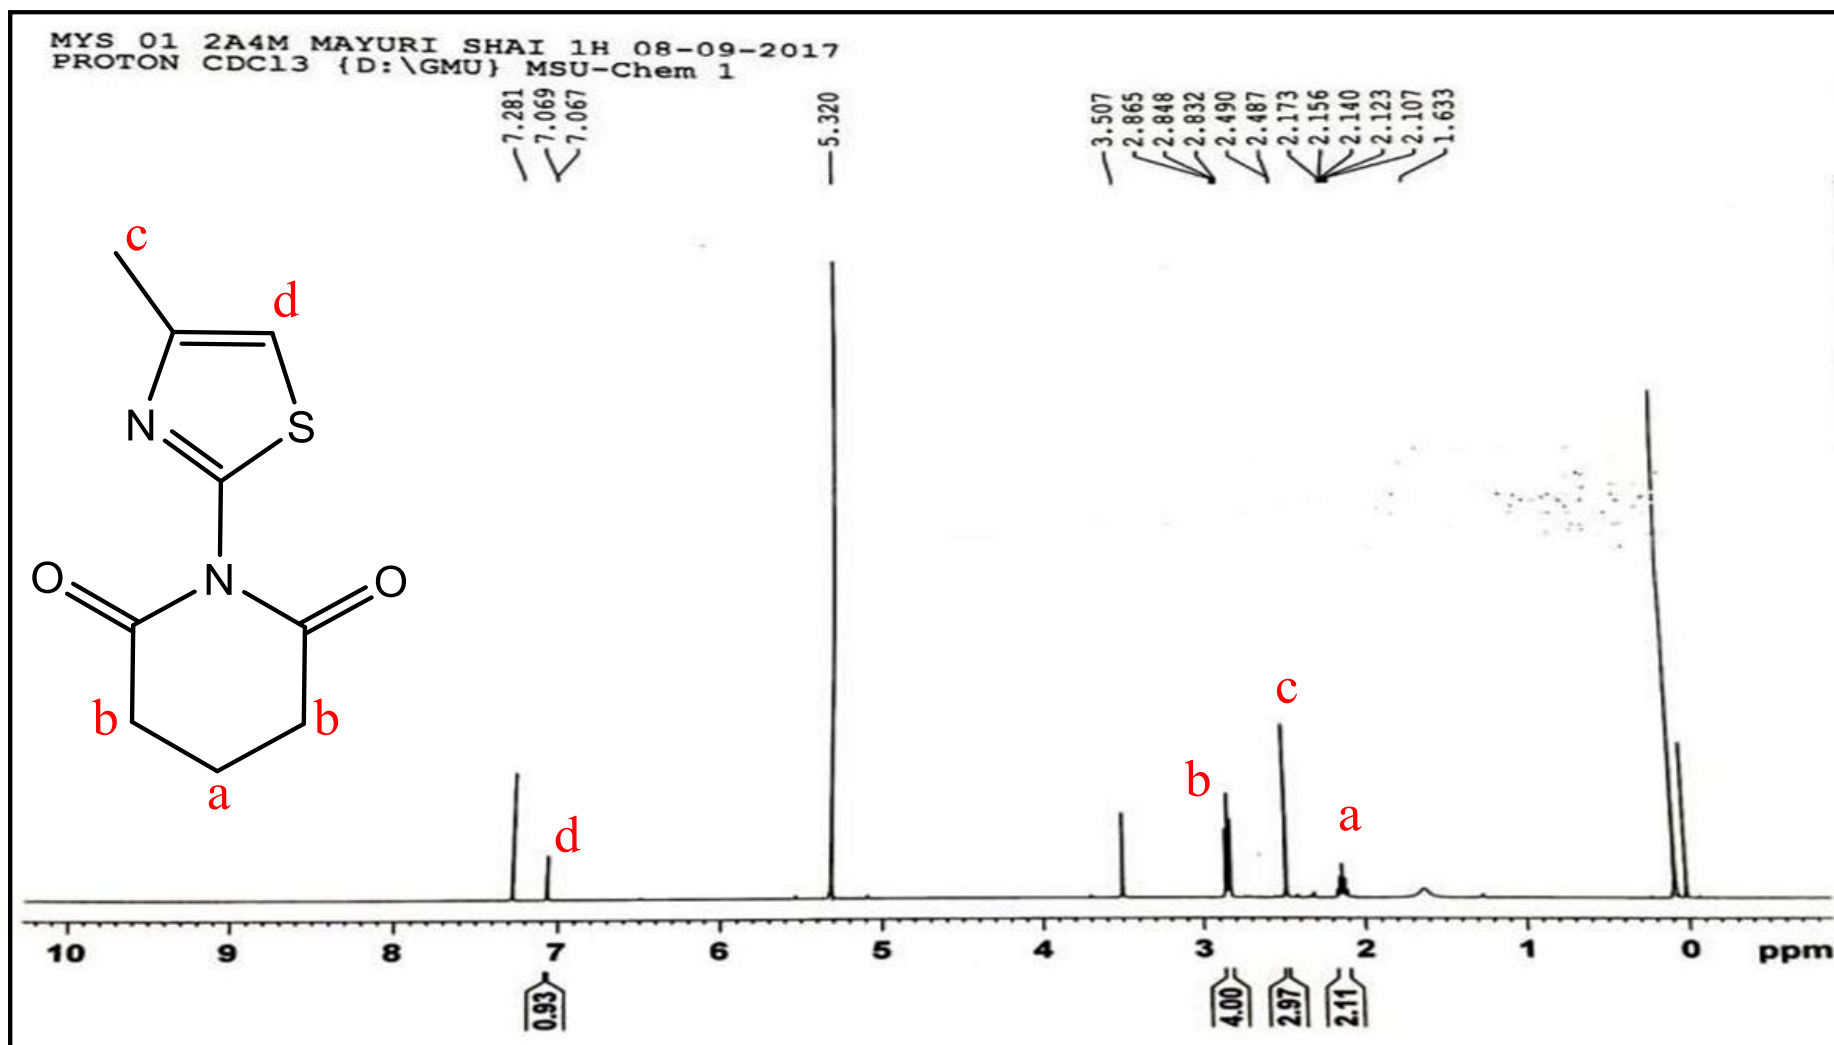

MYS 01 2A4M MAYURI SHAI 13C 08-09-2017  
C13CPD CDCl3 (D:\GMU) MSU-Chem 1

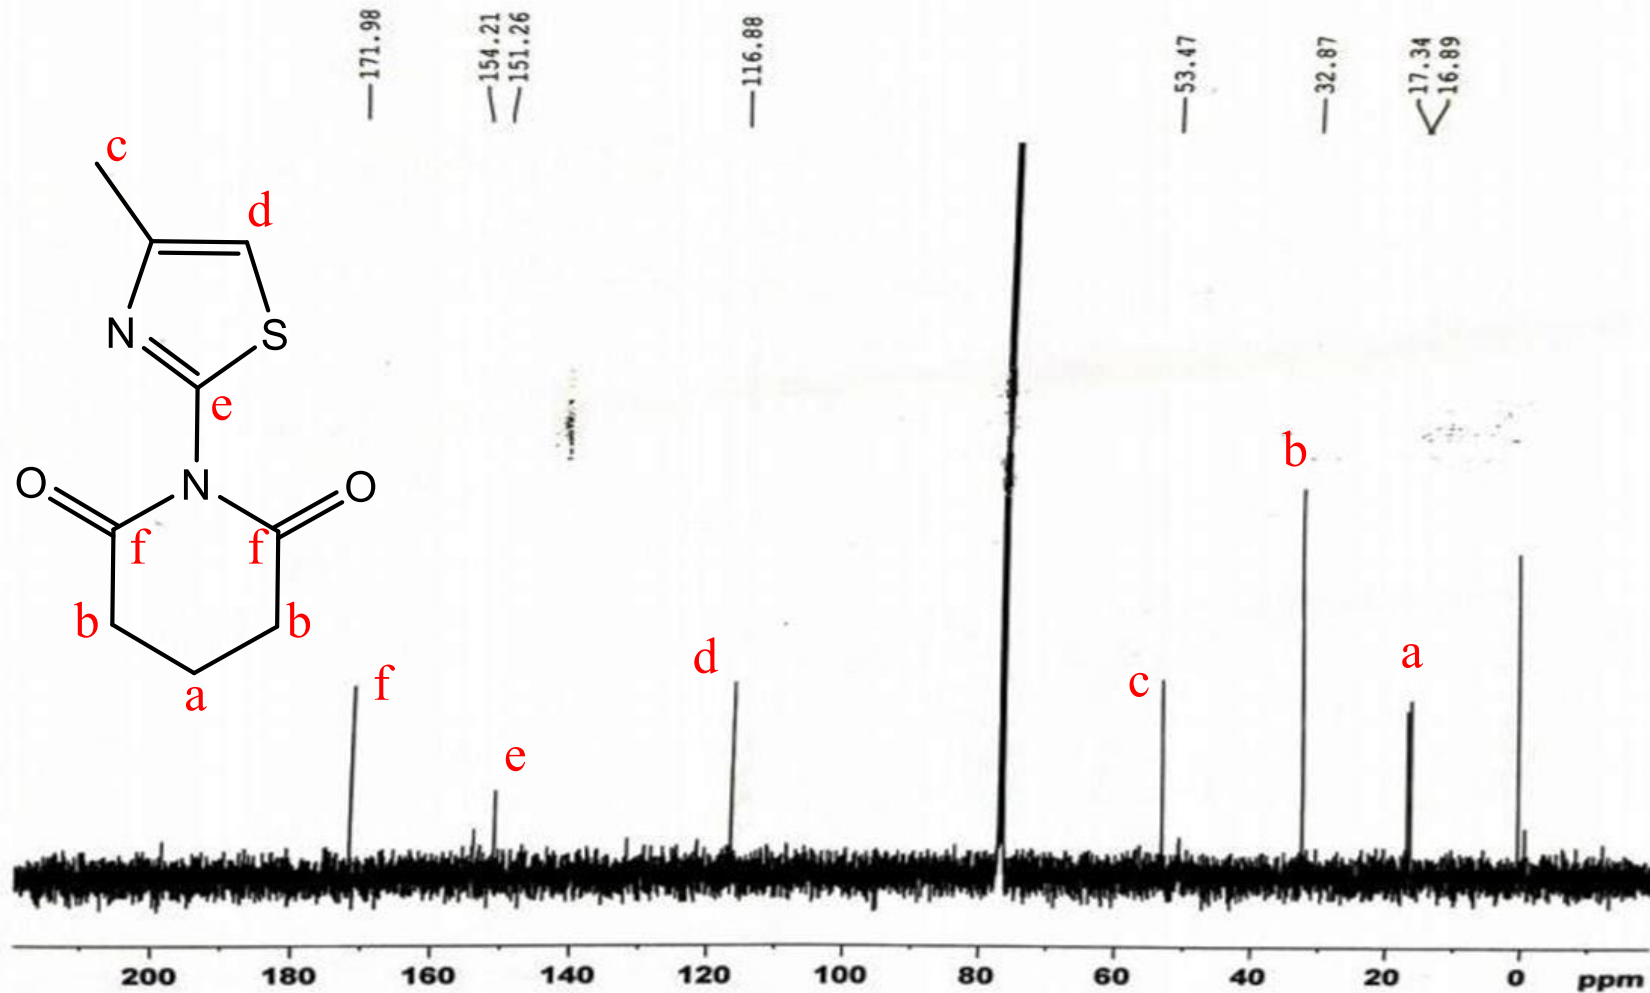

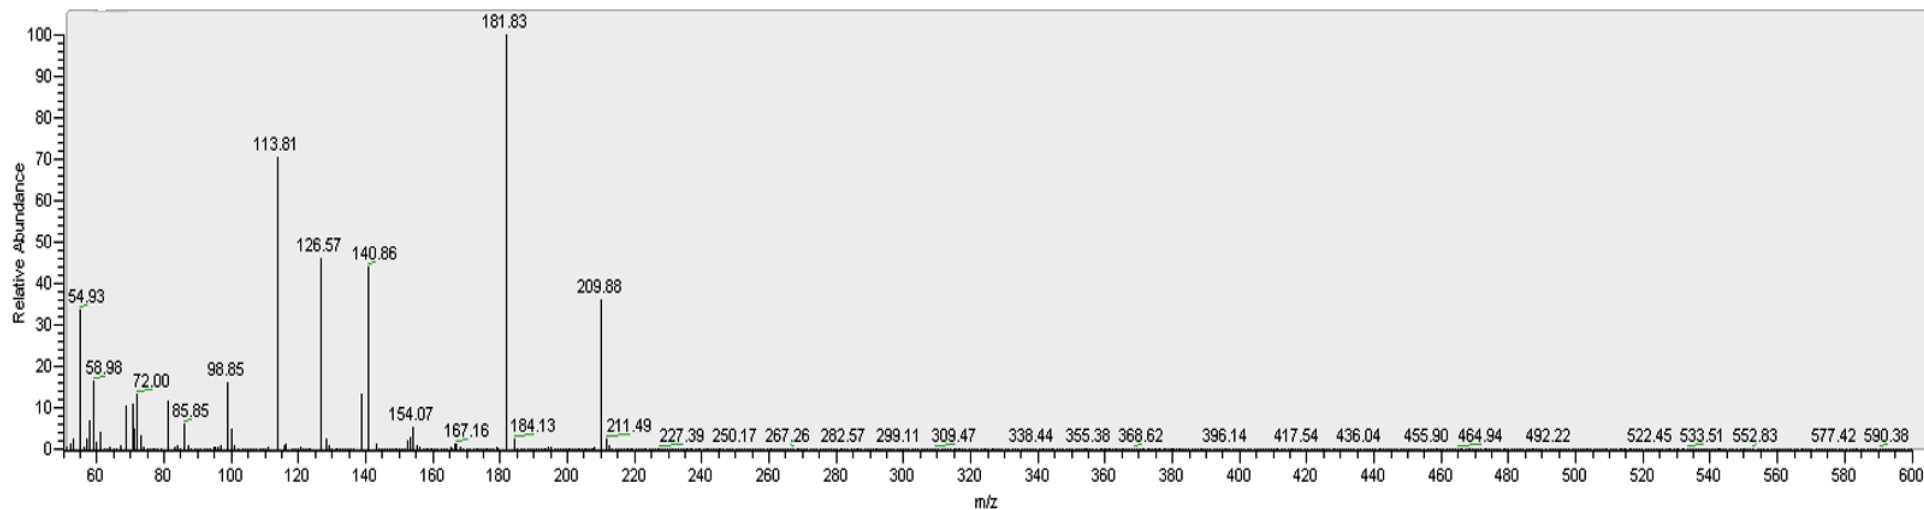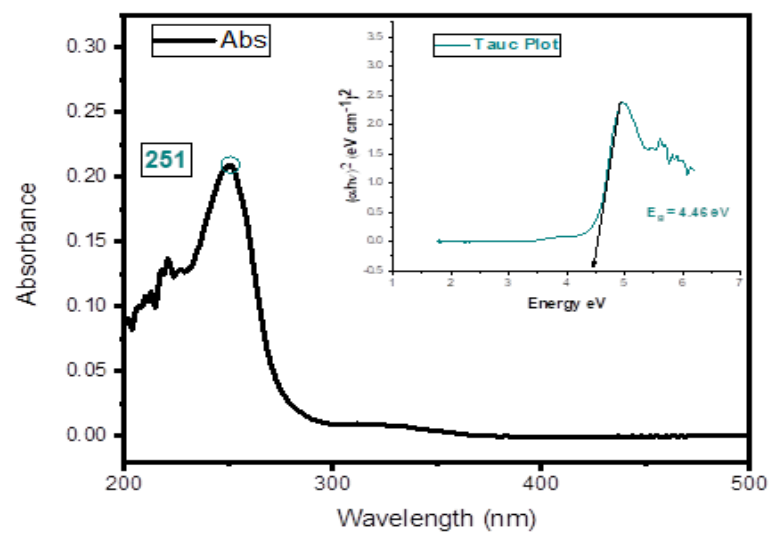

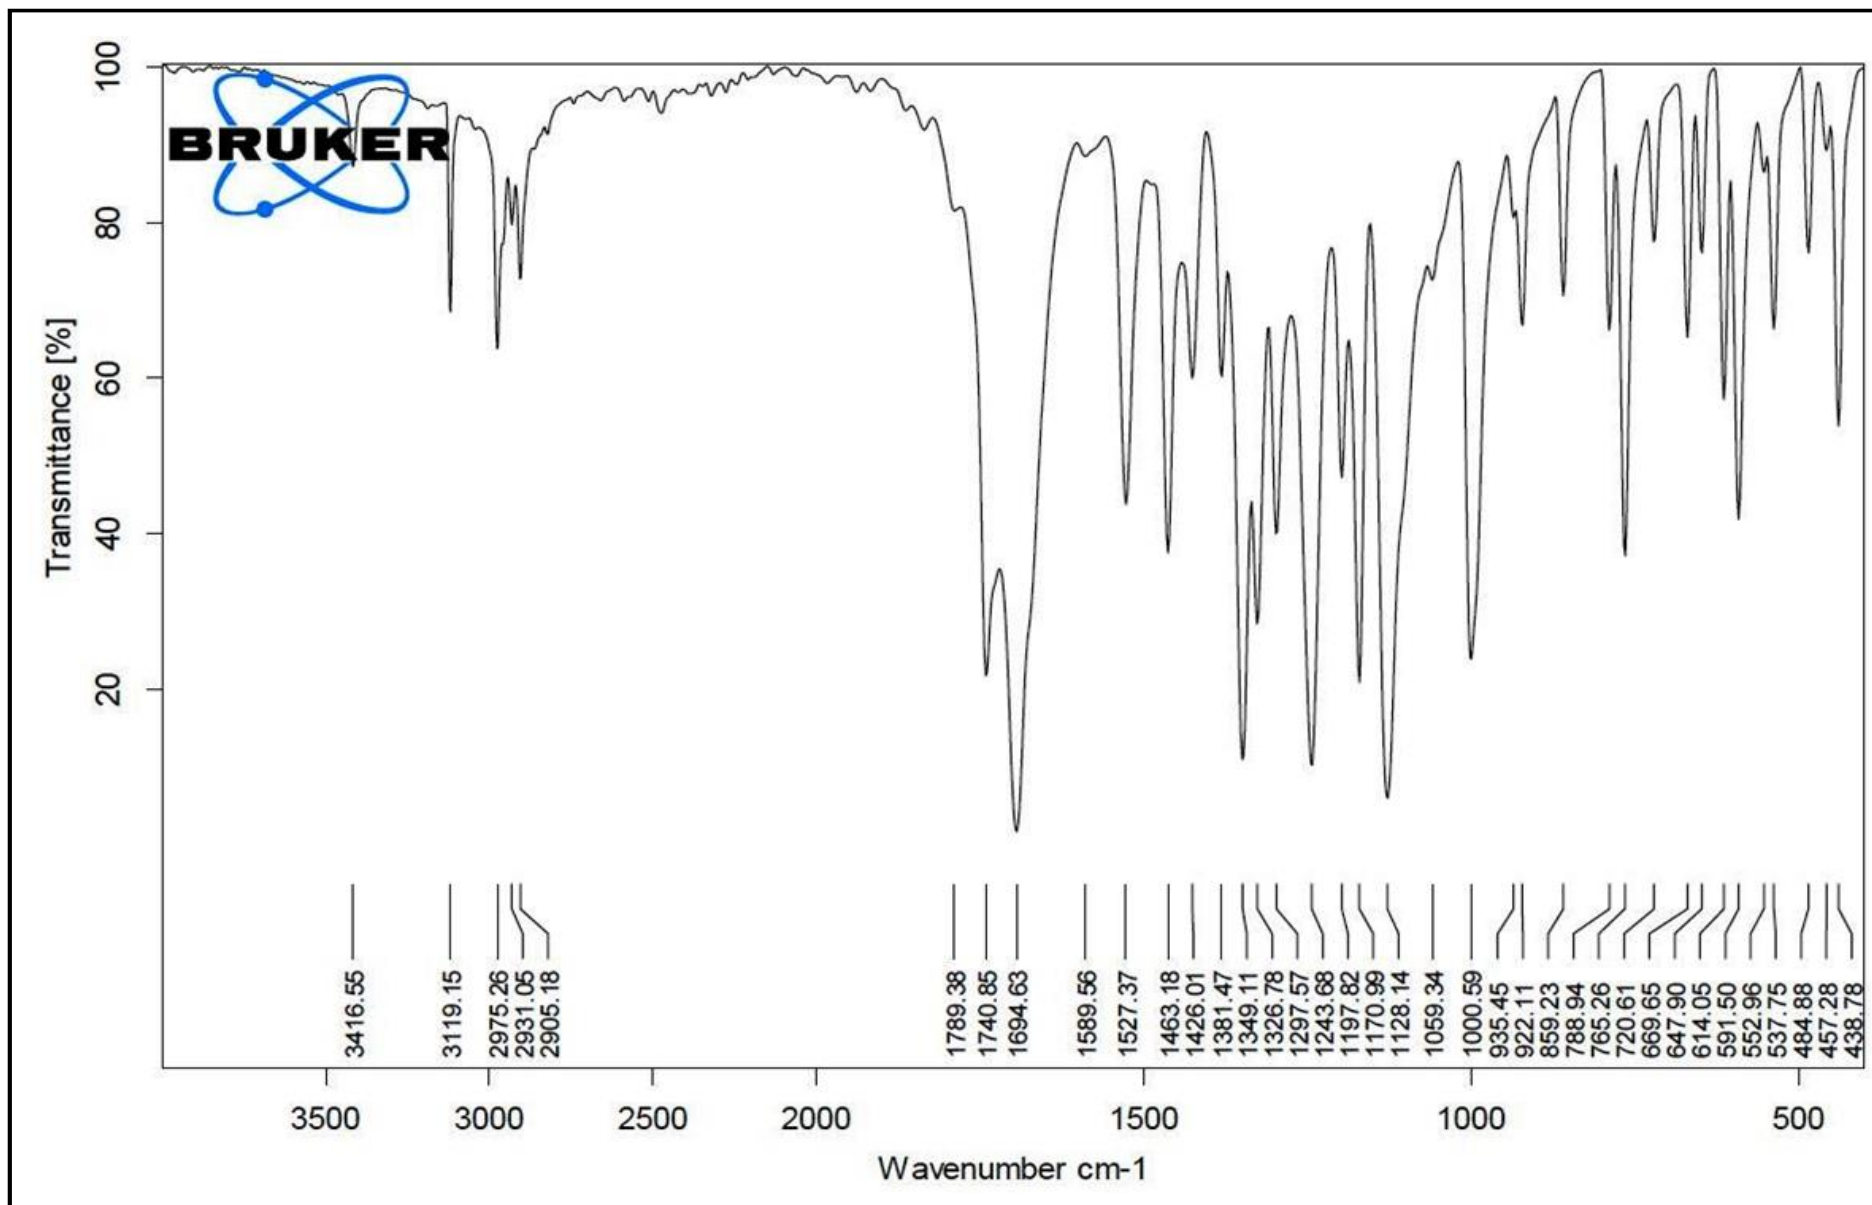

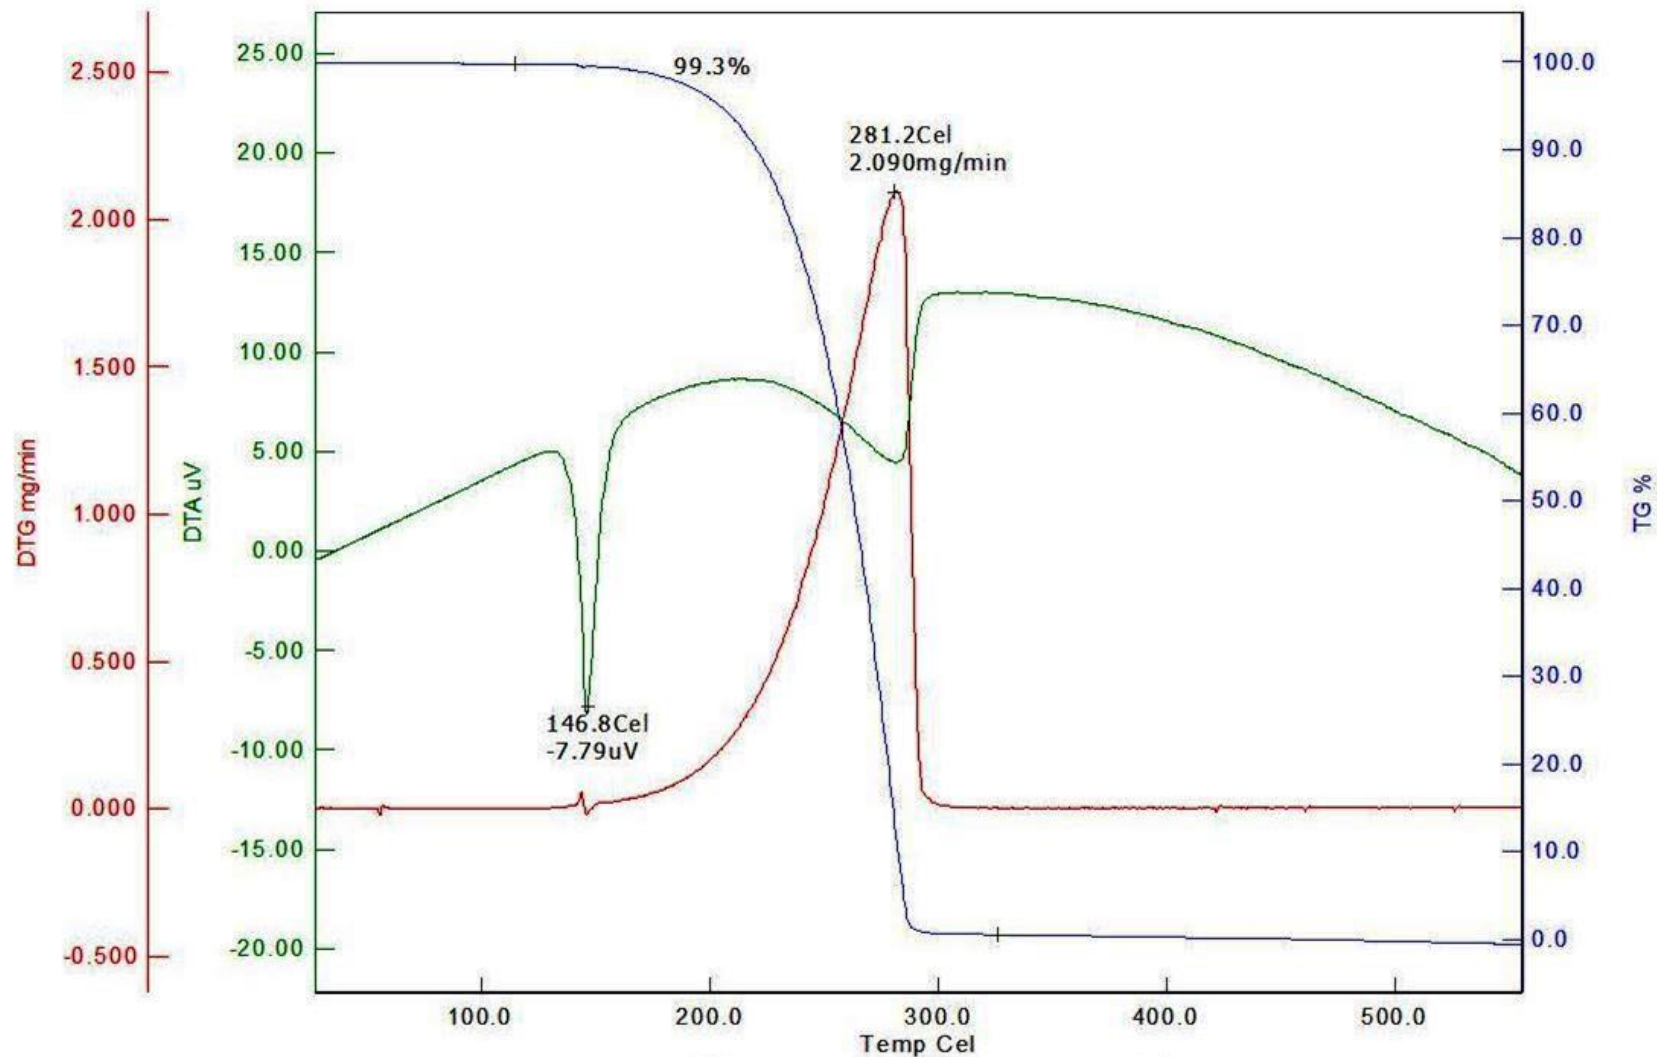

Maharaja Sayajirao University of Baroda

MYS 143 DTA    MYS 143 DTG    MYS 143 TG

2-A-4-MT product: Hirschfeld fingerprint graph and % contribution of weak interactions

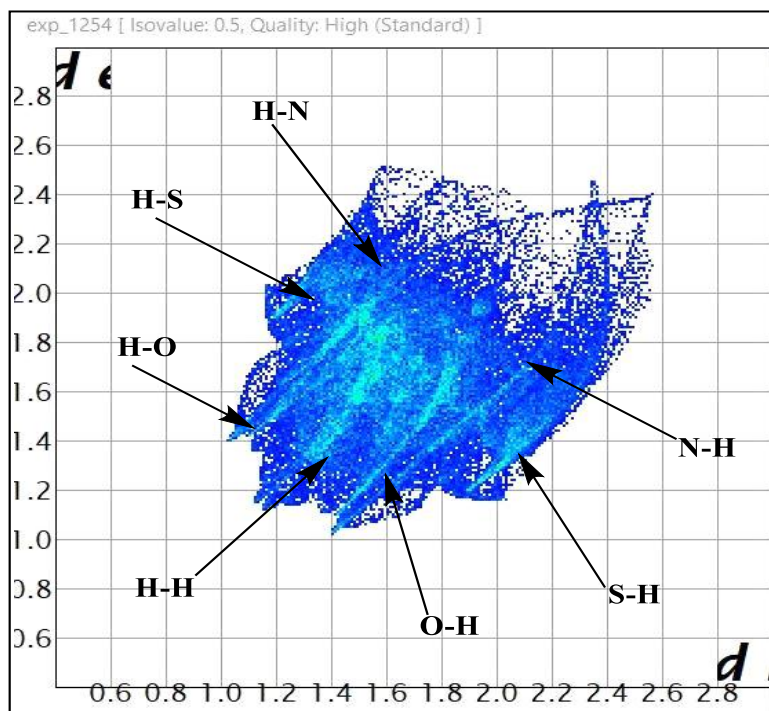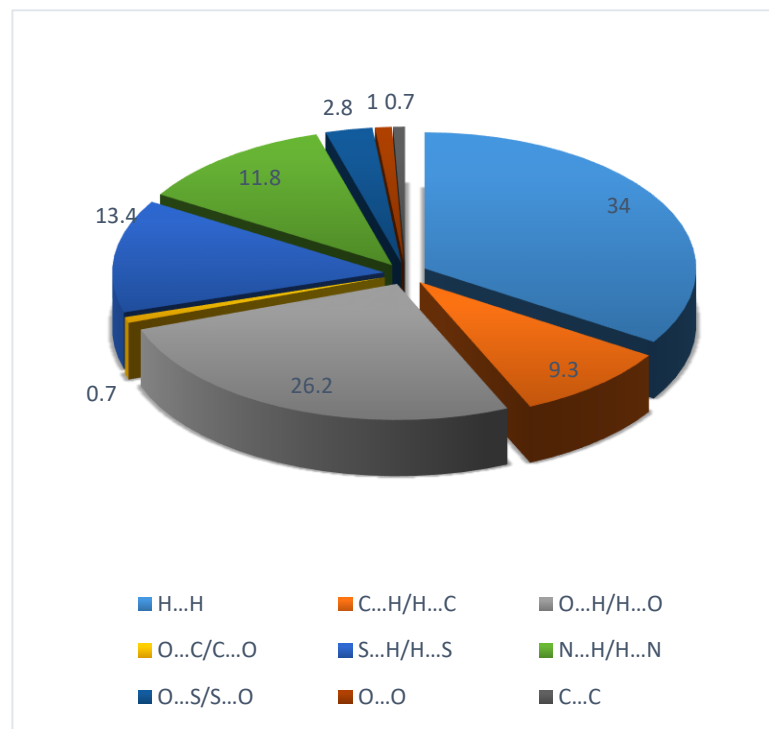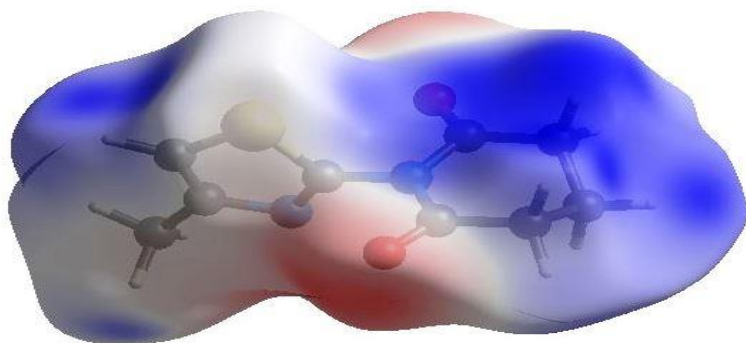



# Data of Compound -4: 2-Amino-4,5-dimethylthiazole derivative

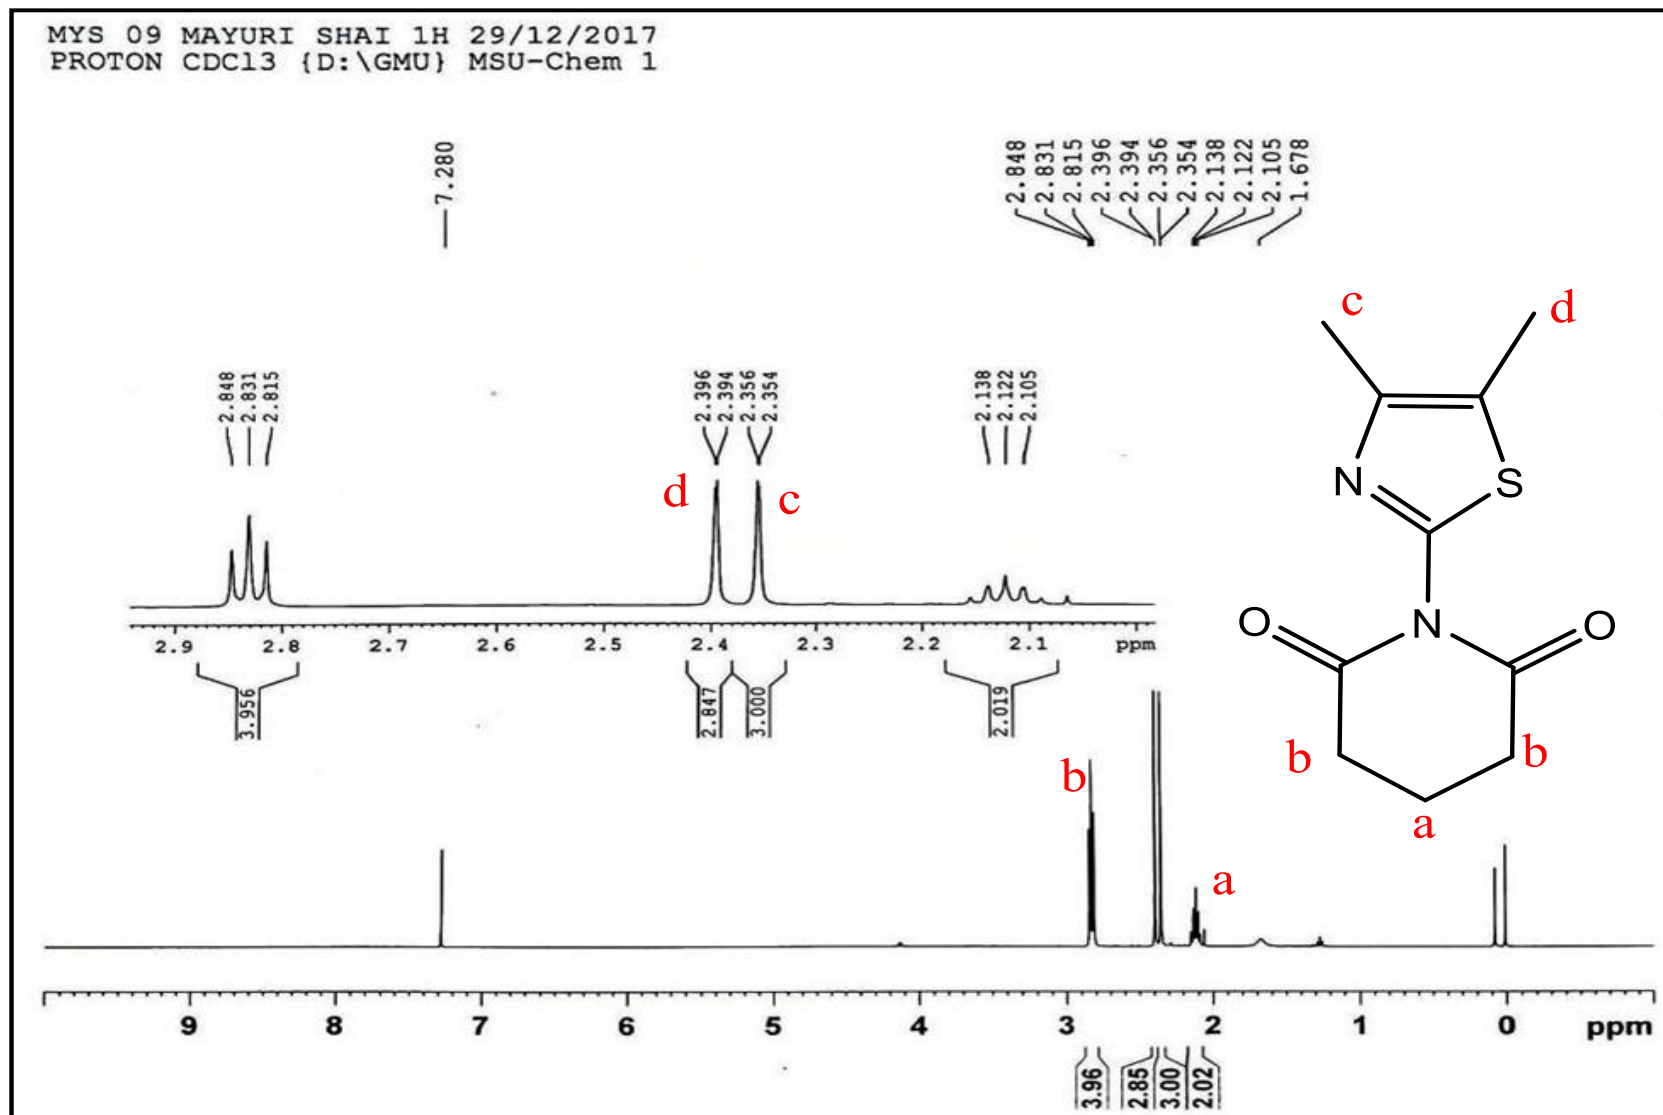



MYS-09 MAYURI 13C 30/12/2017  
C13CPD CDC13 {D:\SRC} MSU-Chem 1

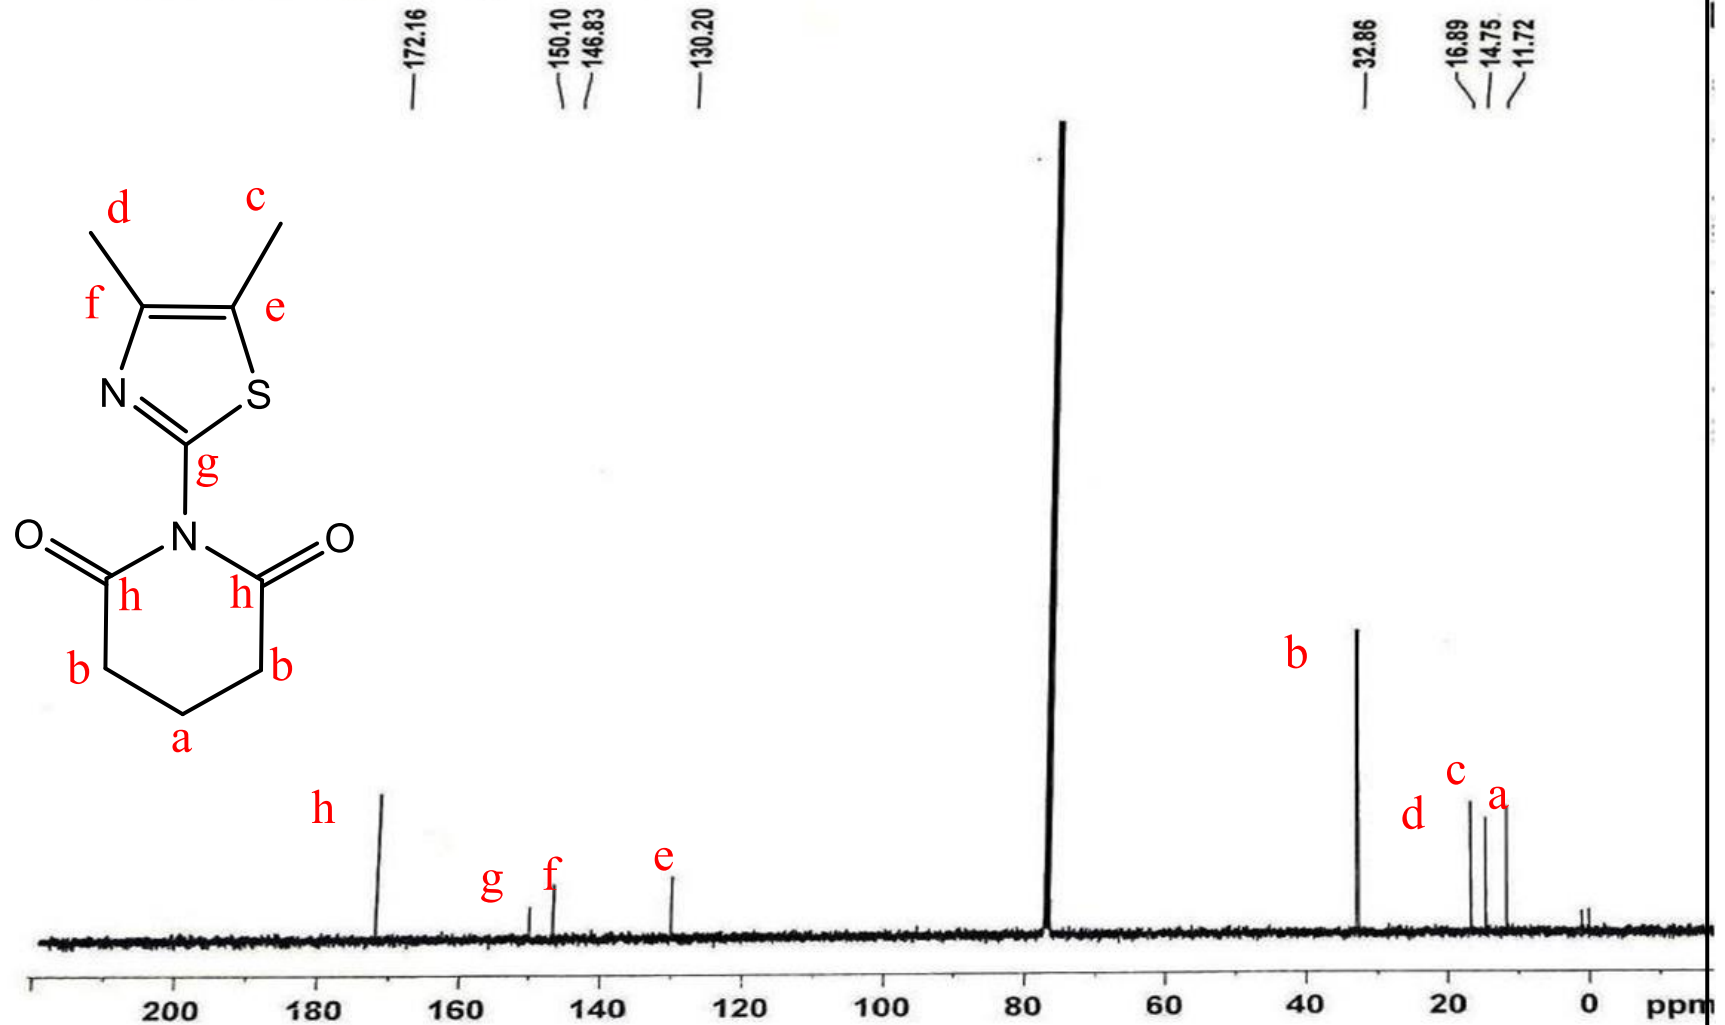

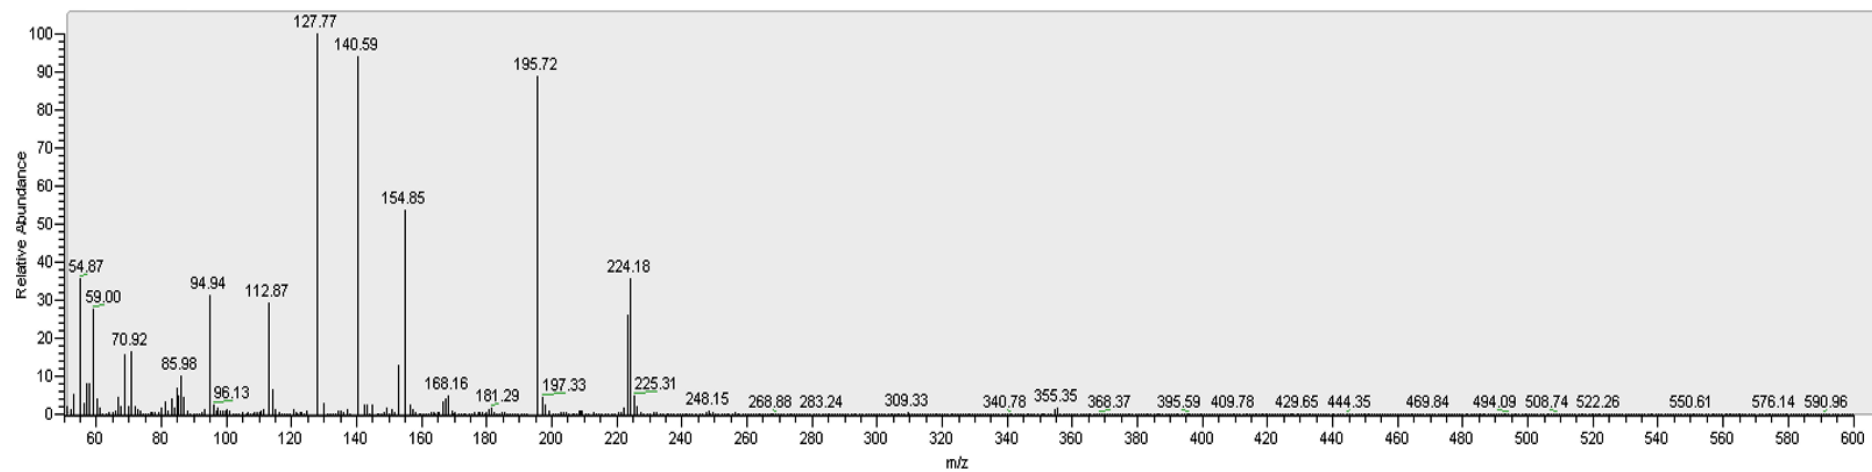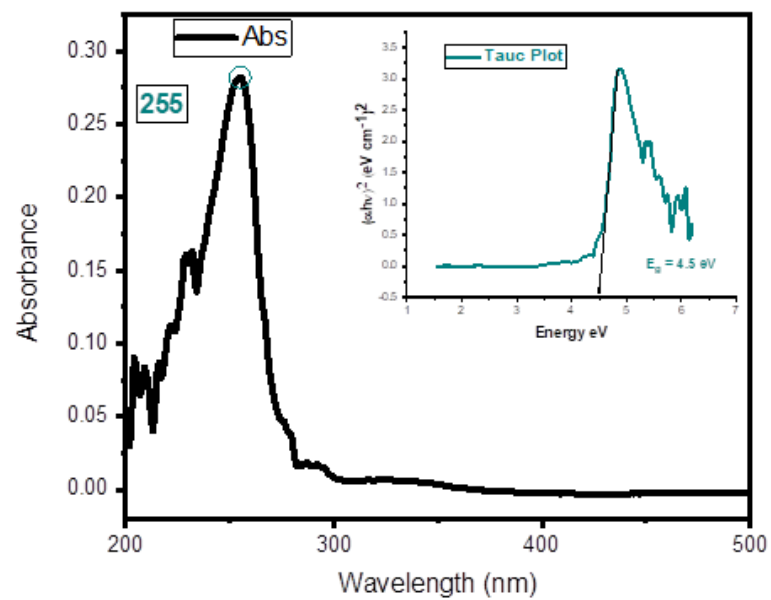

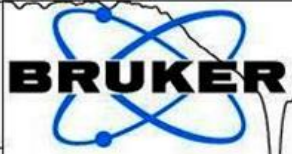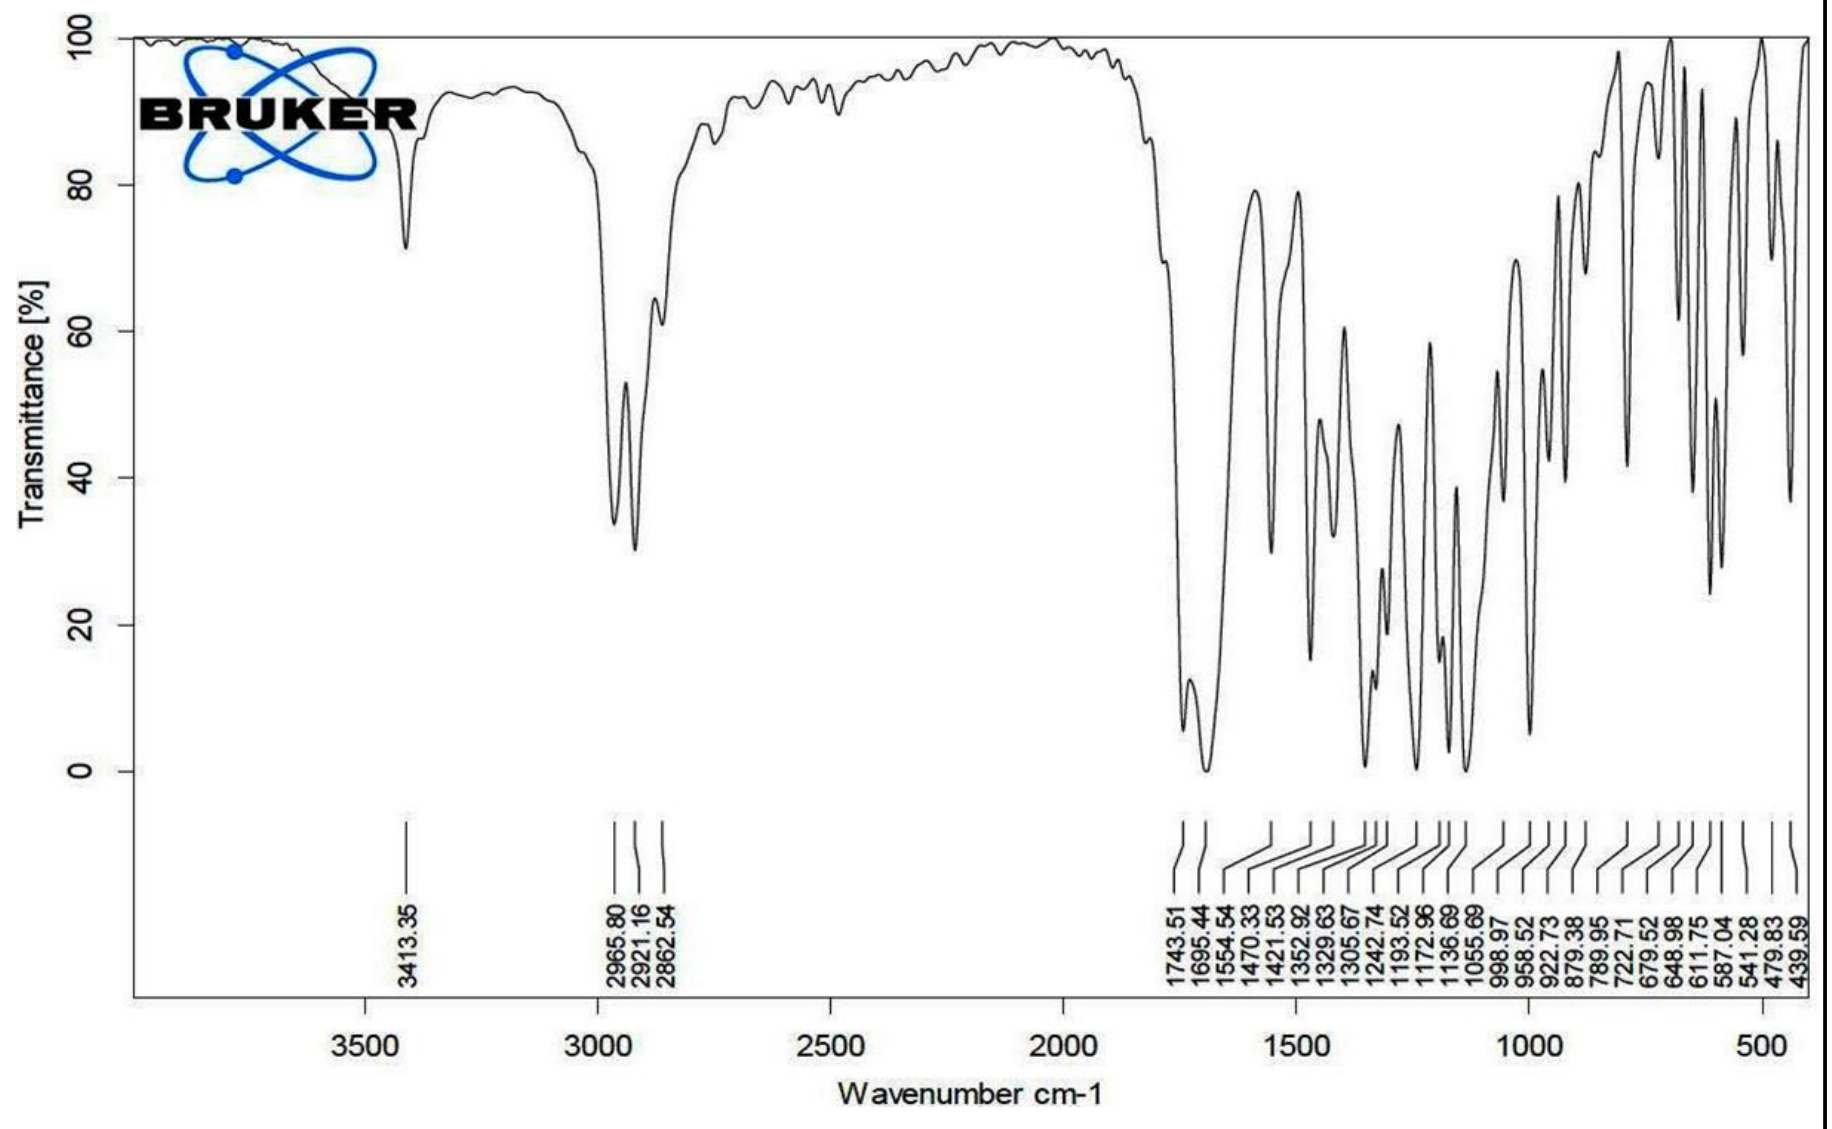

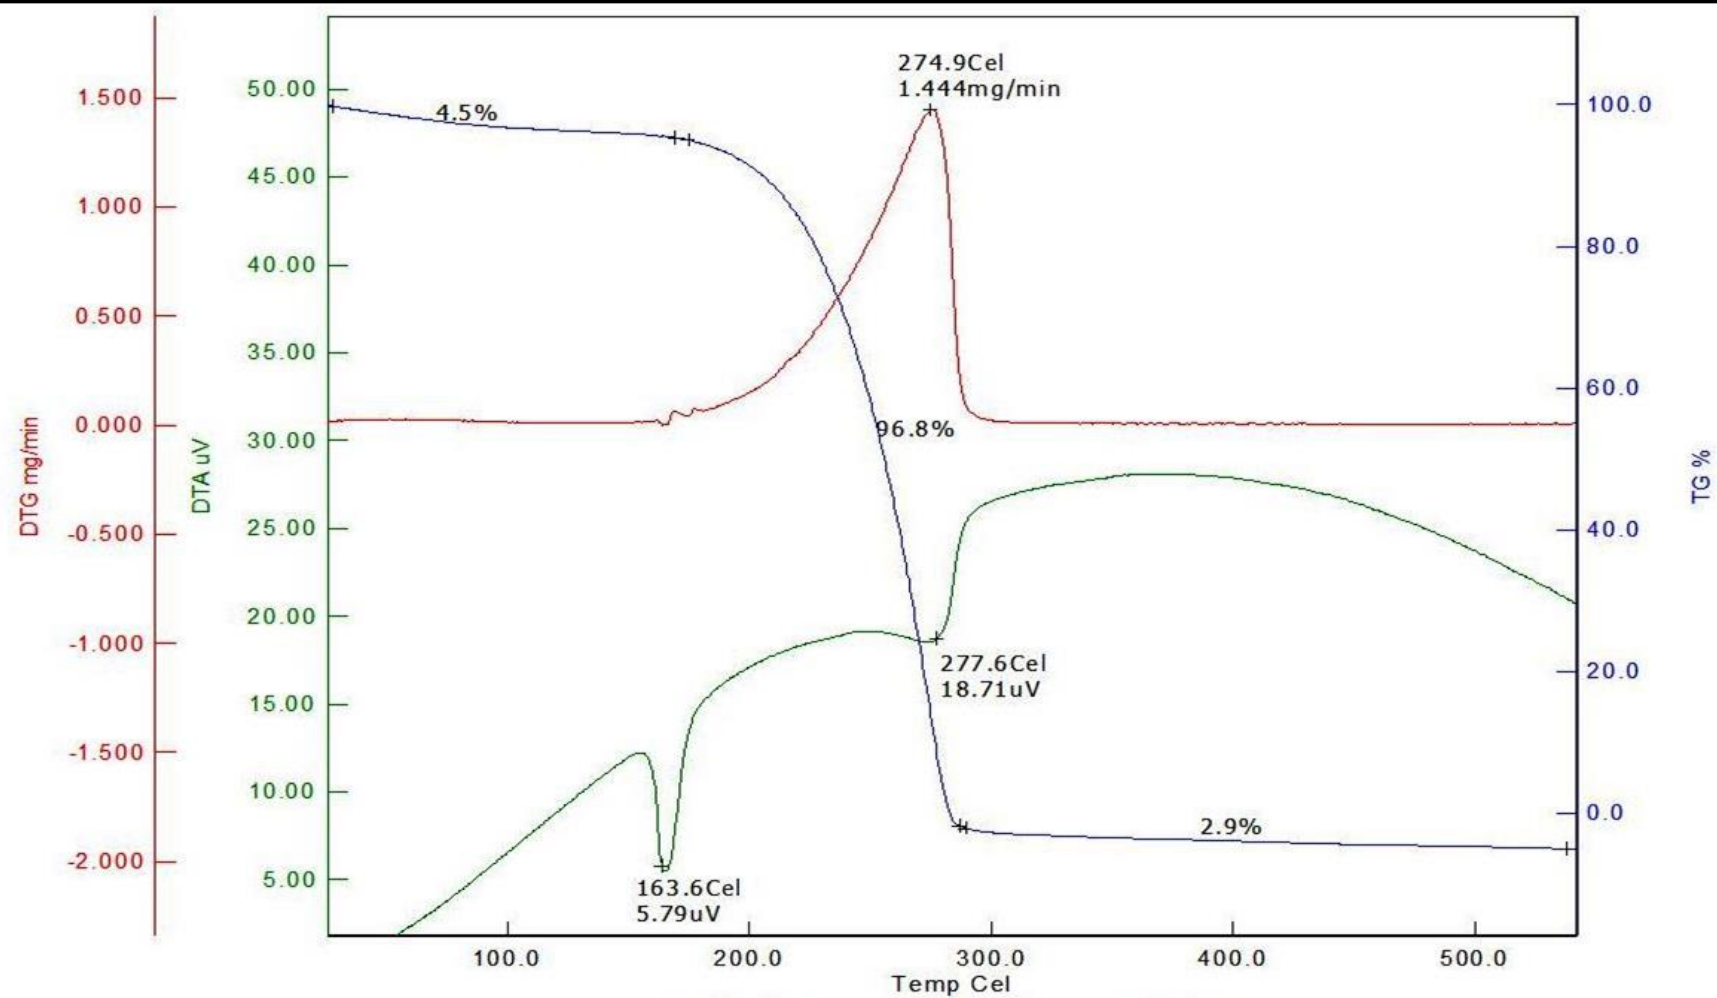

Maharaja Sayajirao University of Baroda

— MYS 144 DTA — MYS 144 DTG — MYS 144 TG

2-A-4,5-DMT product: Hirschfeld fingerprint graph and % contribution of weak interactions

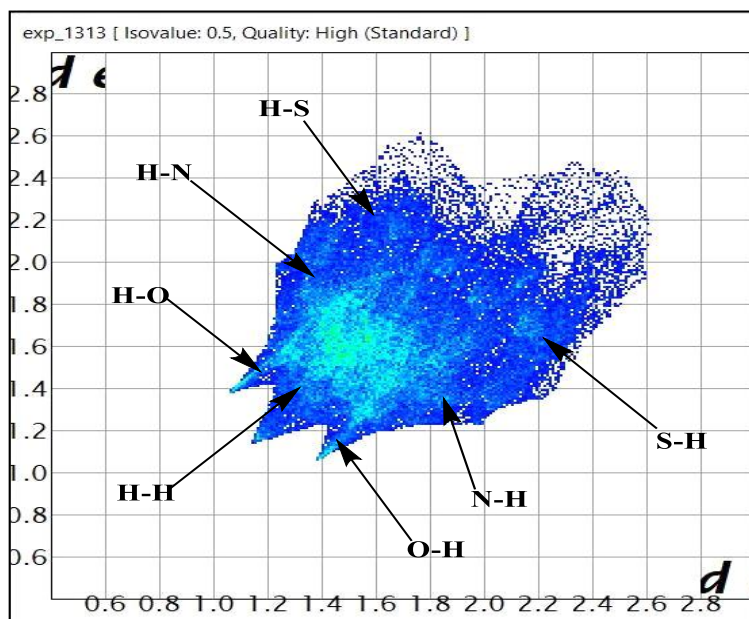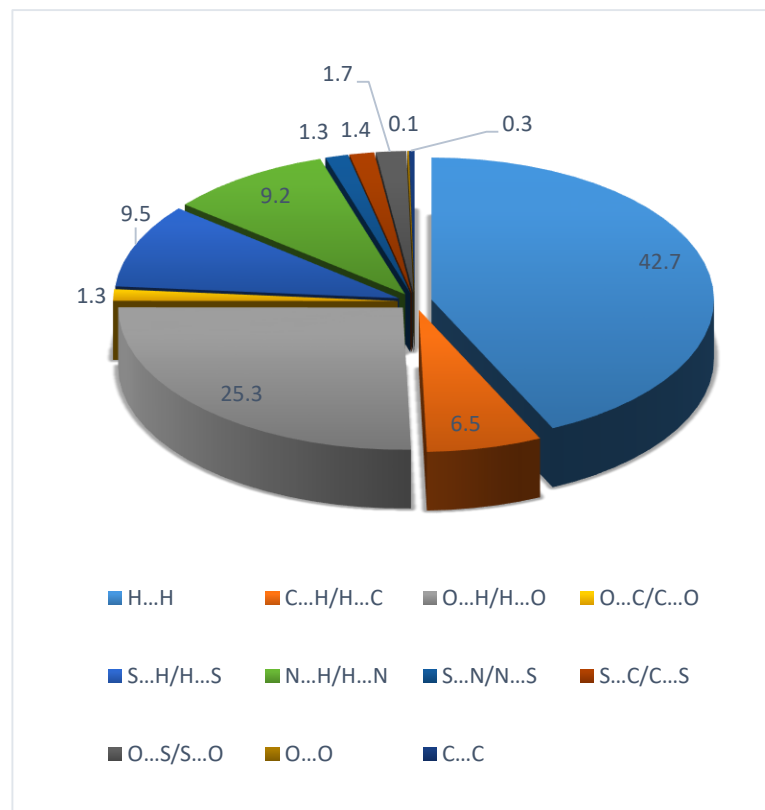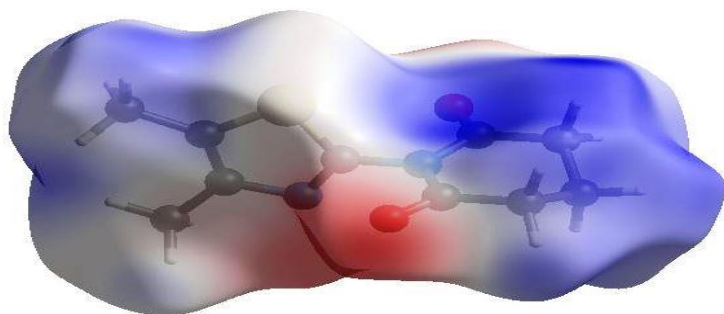

Data of Compound -5: 2-Aminobenzthiazole derivative

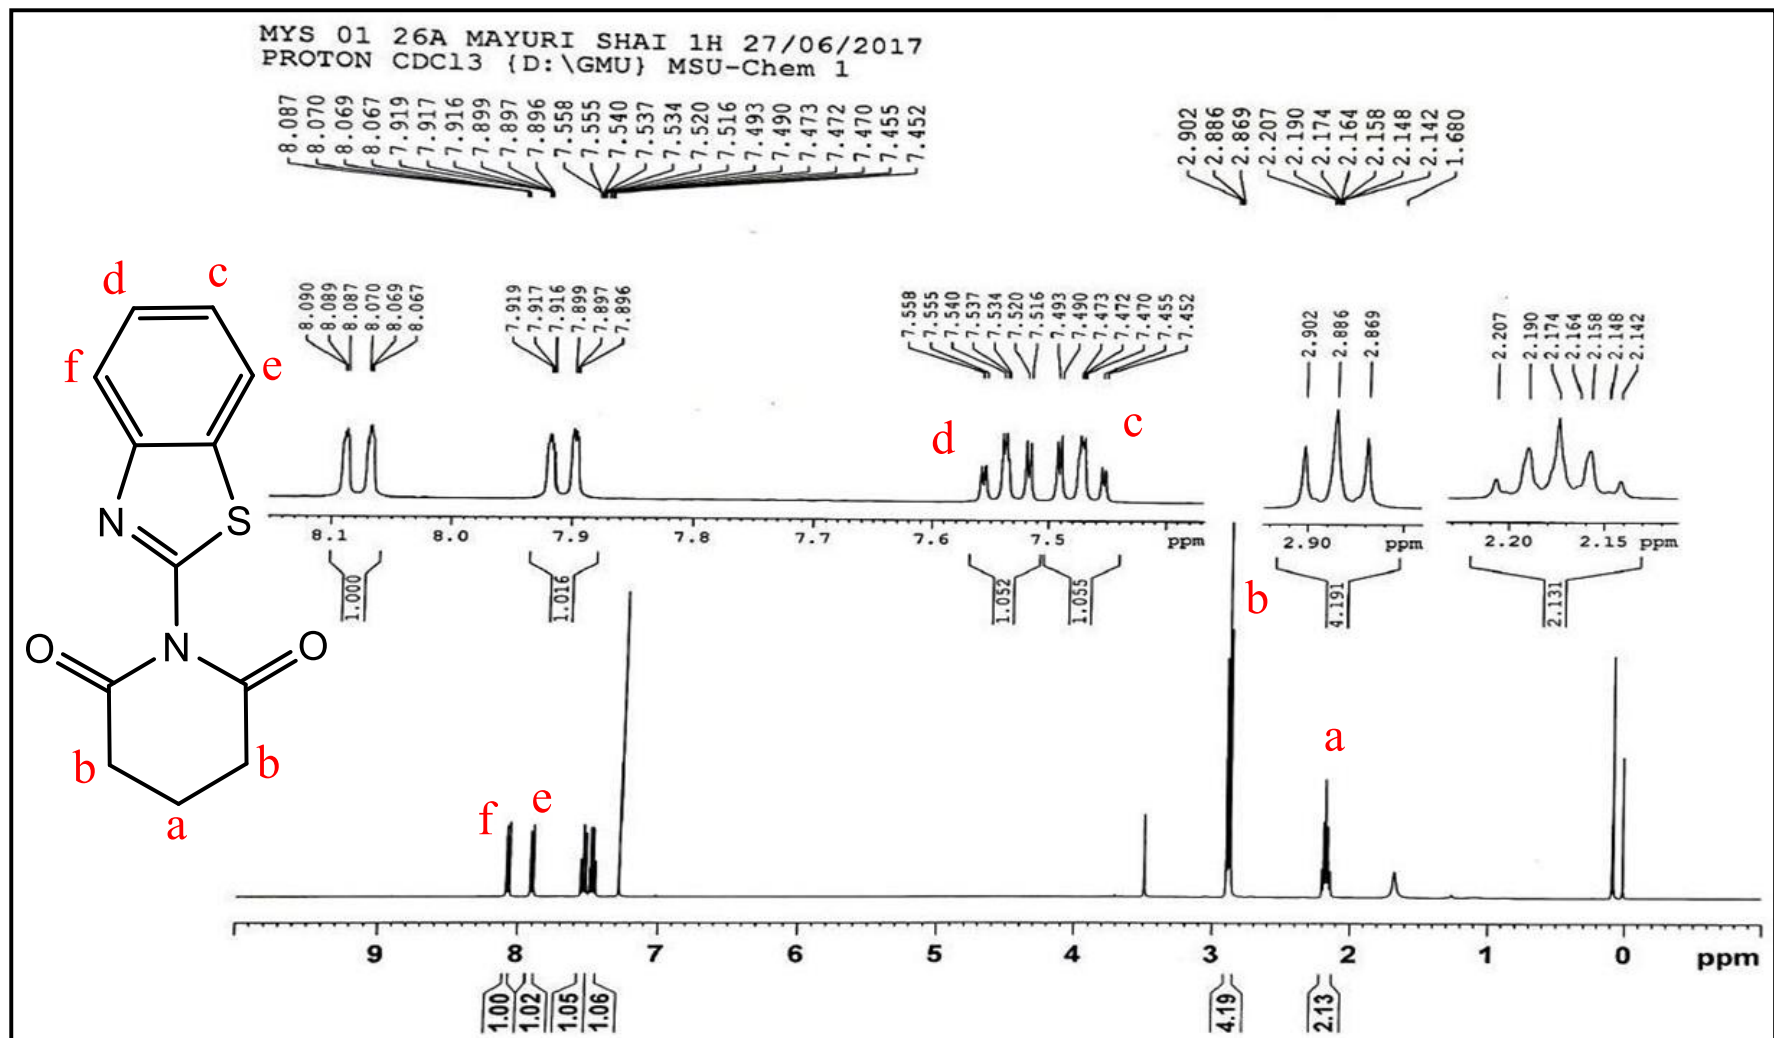

MYS-01-26B R MAYURI S 13C 29/06/2017  
C13CPD CDC13 (D:\IIS) MSU-Chem 1

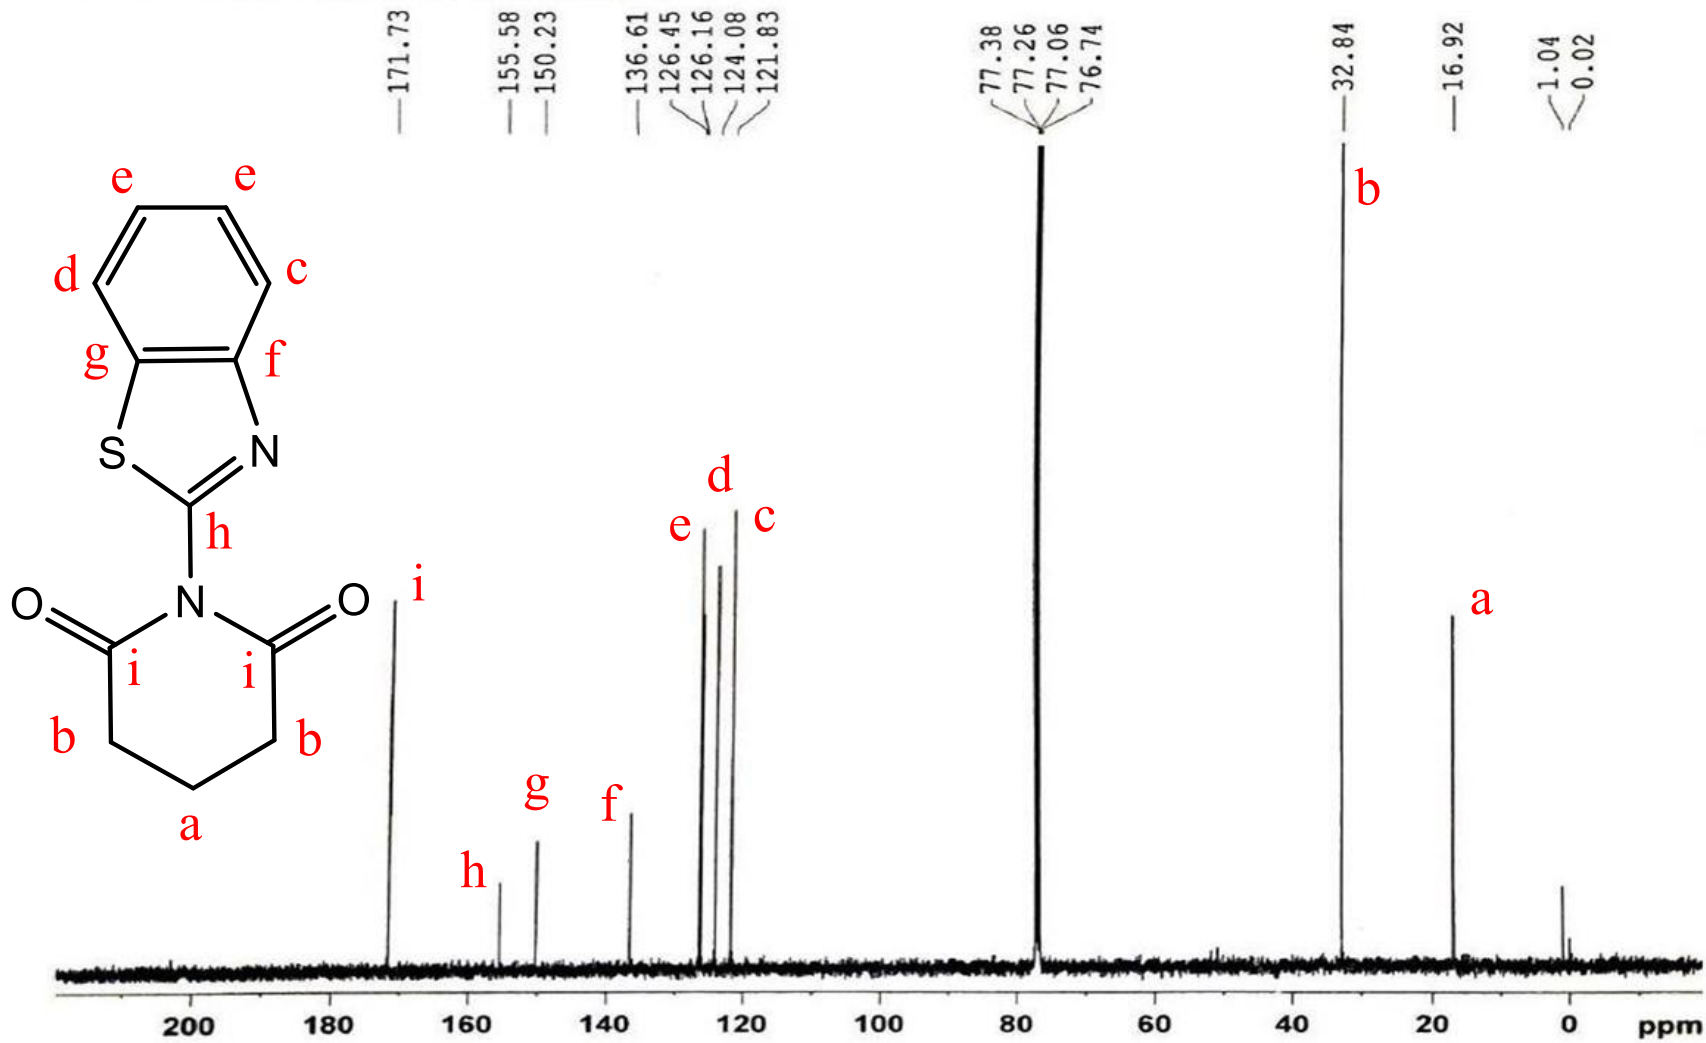

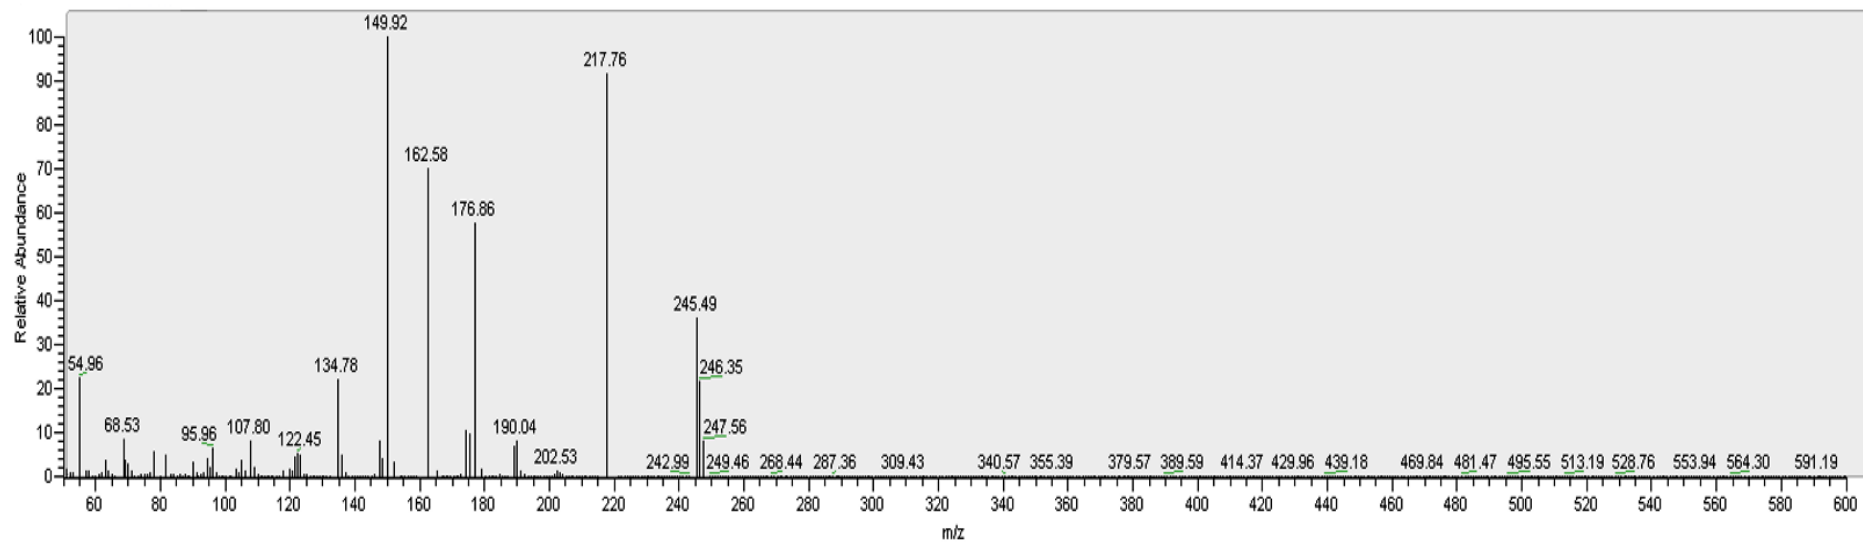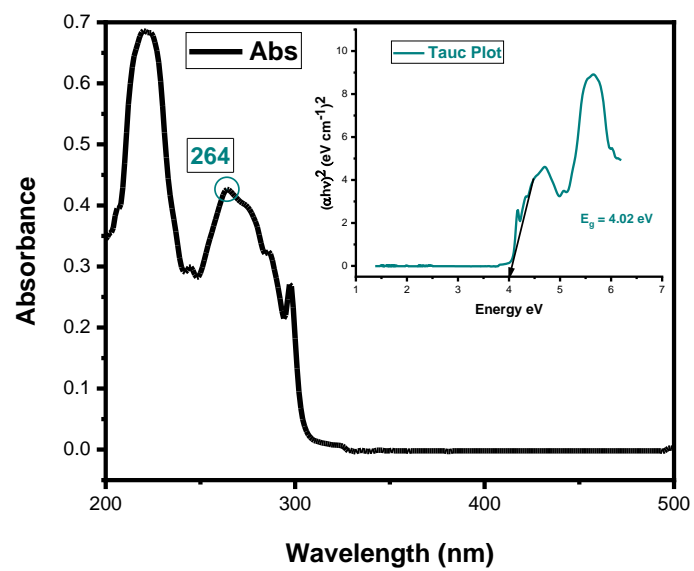



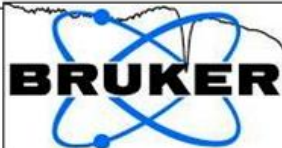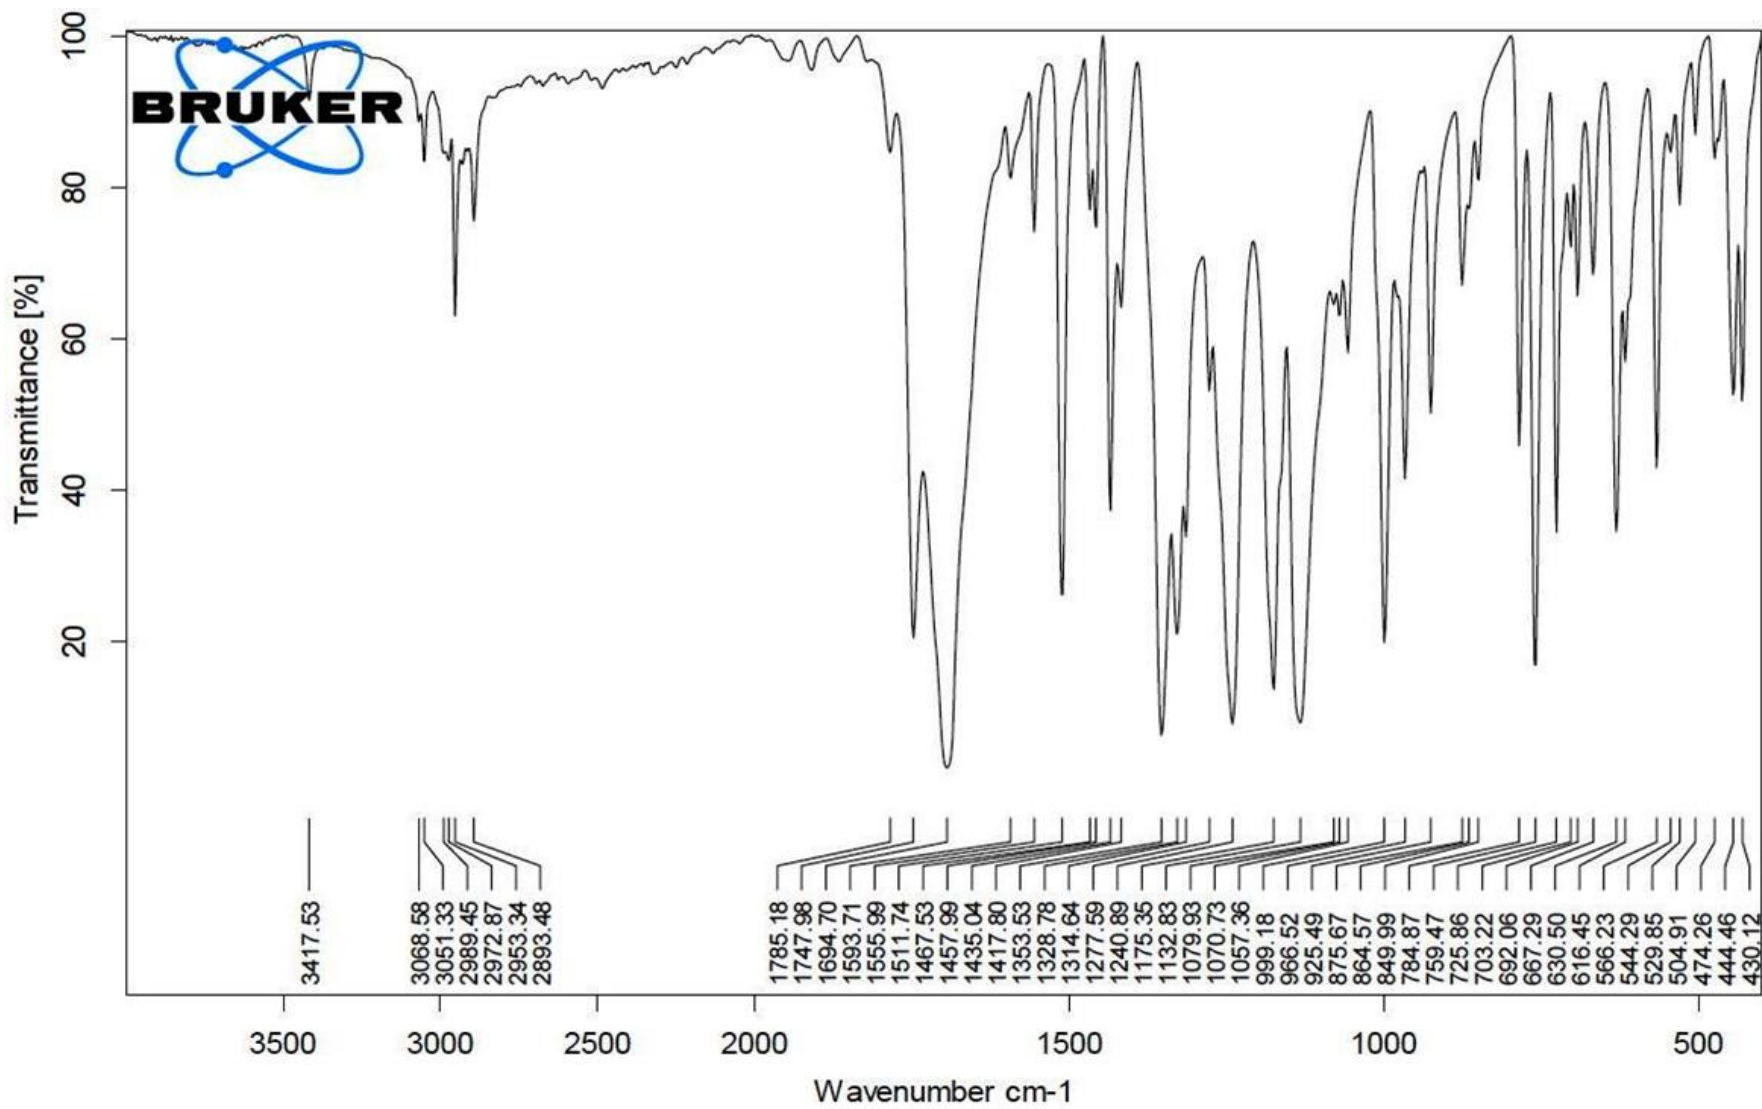

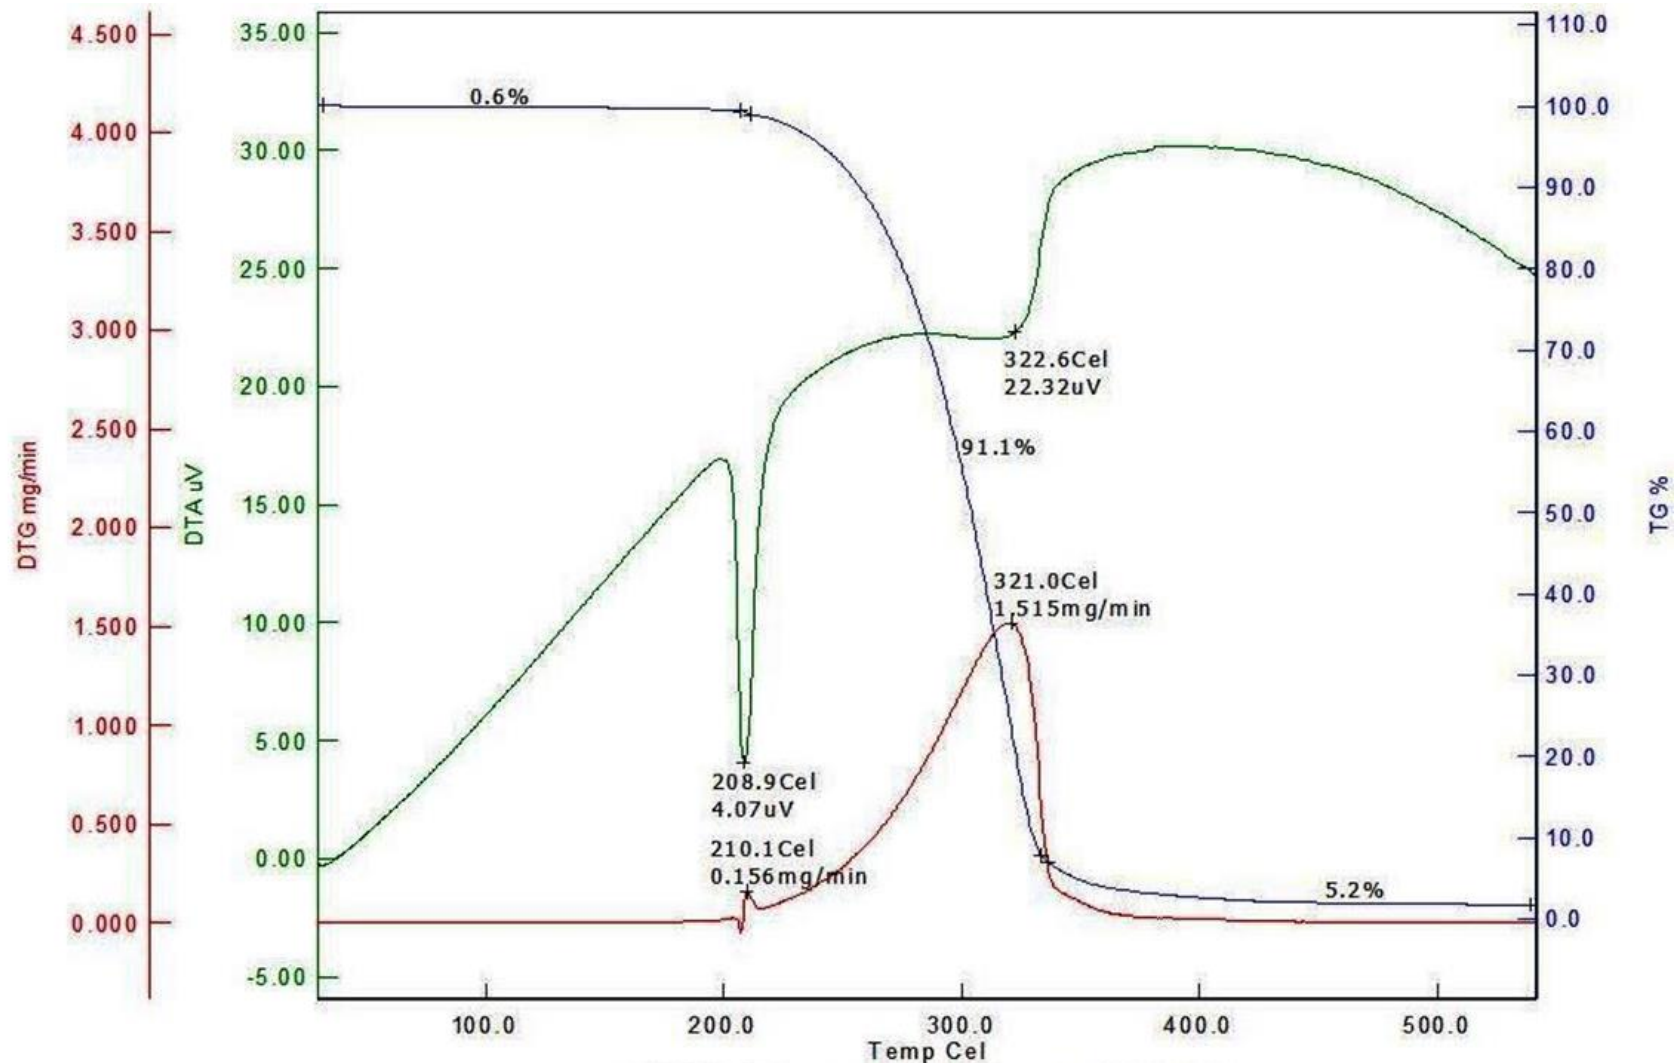

2-ABT product: Hirschfeld fingerprint graph and % contribution of weak interactions

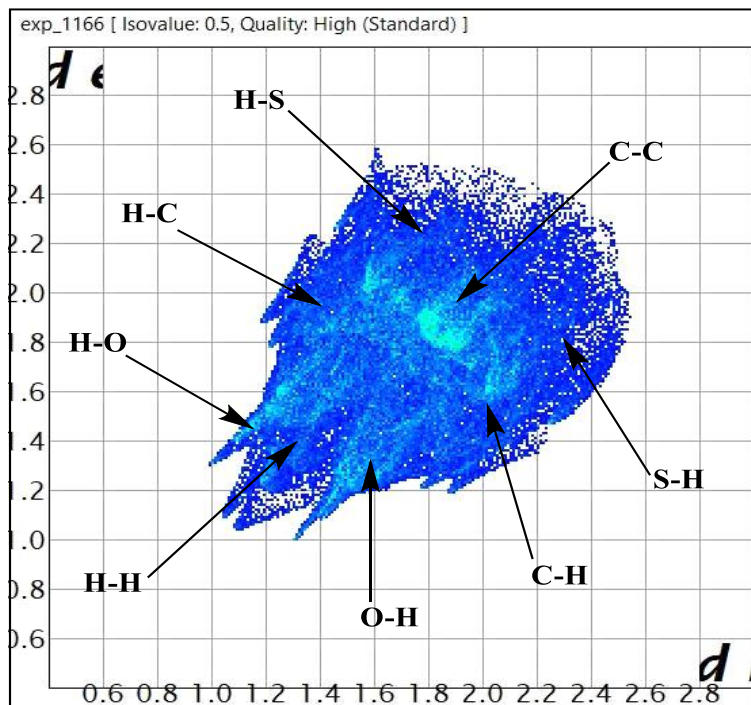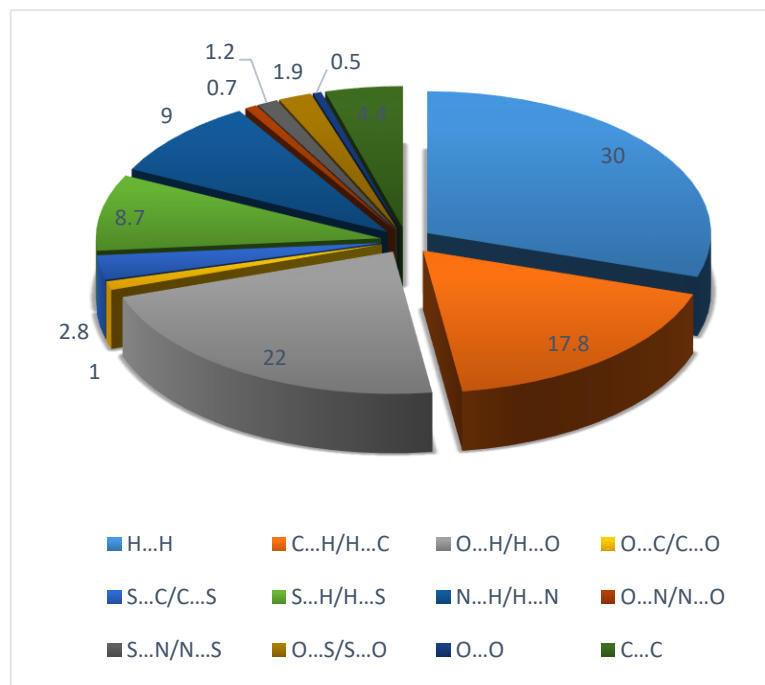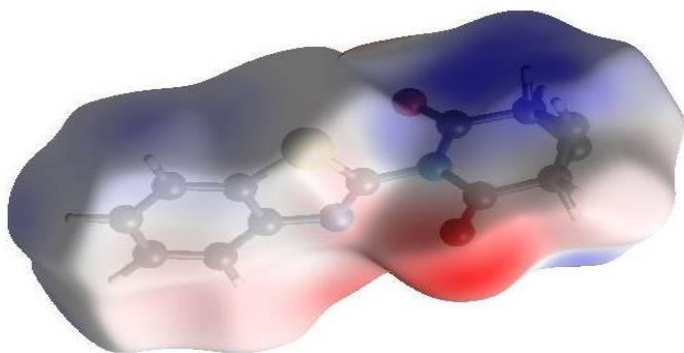

**Table 5:** The comparative table for band gap obtained from experiments and theoretical calculations

| <b>Compounds</b> | <b>Band gap (ev) (UV-Spectra)</b> | <b>Band gap (ev) Tauc plot</b> | <b>Band gap (ev) (Theoretical calculations in gaseous phase)</b> | <b>Band gap (ev) (Theoretical calculations in THF)</b> |
|------------------|-----------------------------------|--------------------------------|------------------------------------------------------------------|--------------------------------------------------------|
| 1                | 5.14                              | 4.80                           | 5.87                                                             | 5.87                                                   |
| 2                | 5.02                              | 4.50                           | 5.65                                                             | 5.65                                                   |
| 3                | 4.93                              | 4.46                           | 5.58                                                             | 5.58                                                   |
| 4                | 4.86                              | 4.50                           | 5.36                                                             | 5.36                                                   |
| 5                | 4.7                               | 4.02                           | 5.30                                                             | 5.30                                                   |

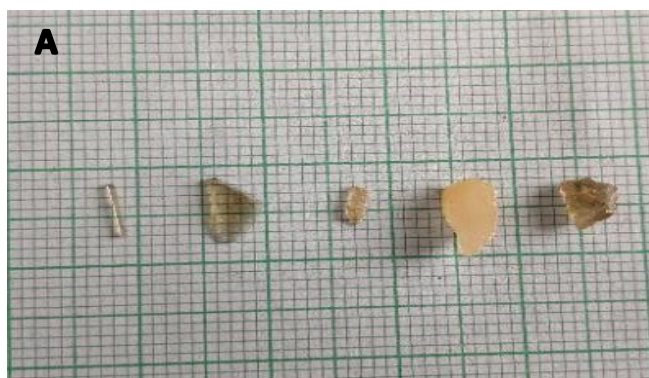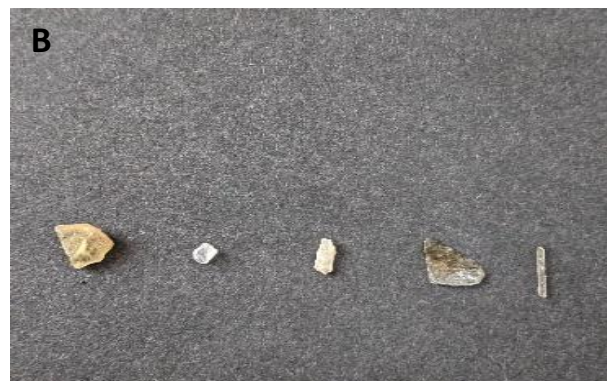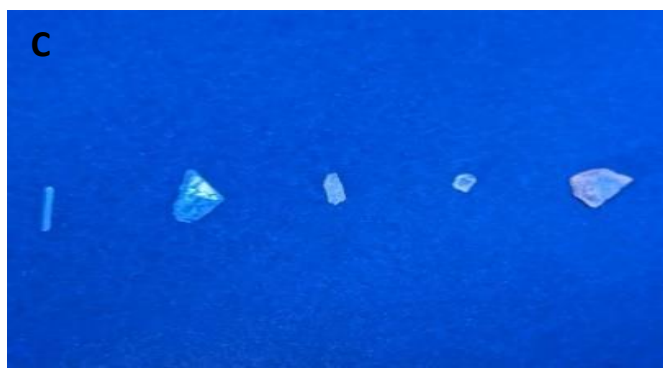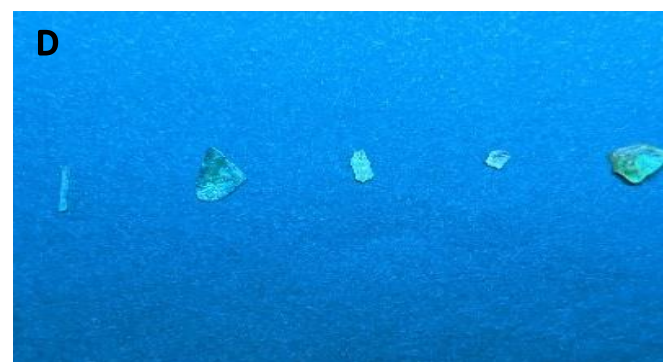

Figure S1: A) image of Crystals of compounds (1-5) placed on graph paper (for maximum size); (b) Crystals image in Visible light; C) Crystal image in Short UV light; D) Crystal image in long UV light

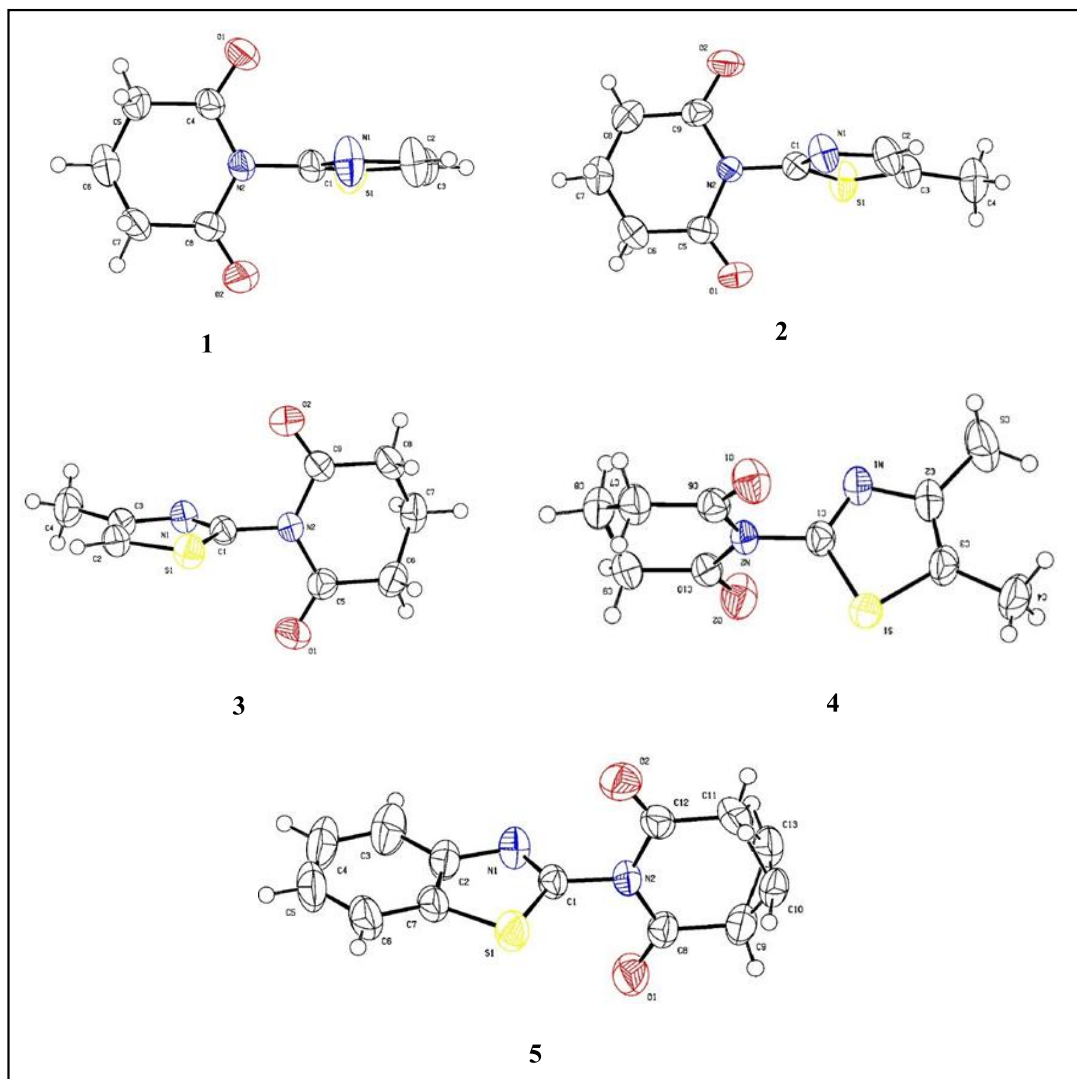

Figure S2: ORTEP (50% probability) diagram of 1–5.



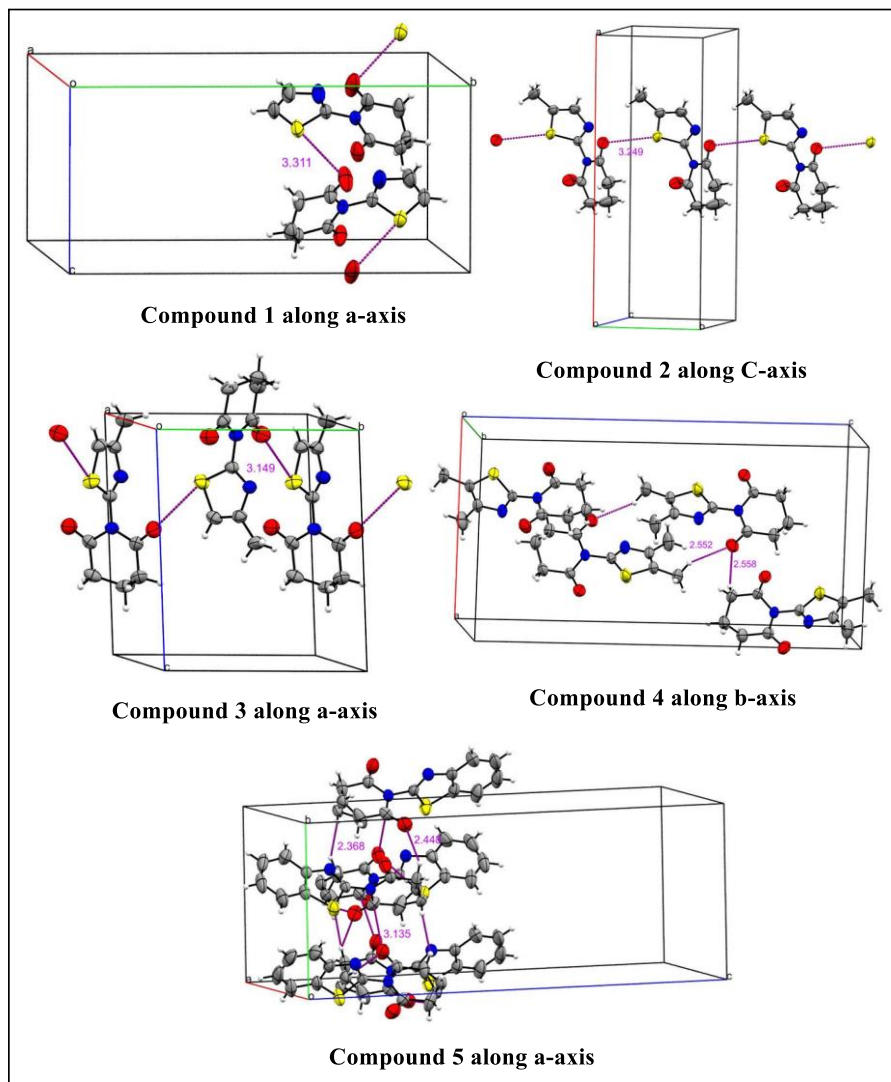

Figure S3: ORTEP diagram of compounds 1-5 with crystallographic axis.

**Table 6: The computed global reactivity parameters of all considered systems in the gas phase.**

| <i>Syste<br/>ms/Co<br/>mpou<br/>nd</i> | <i>ionization<br/>potential</i><br>$(IP = -E_{HOMO})$ | <i>electron<br/>affinity</i><br>$((EA = -E_{LUMO})$ | <i>electron<br/>egativity</i><br>$(\chi = (IP + EA)/2)$ | <i>chemica<br/>l<br/>potential</i><br>$(\mu')$<br><br>$(\mu' = -\chi)$ | <i>hardnes<br/>s (<math>\eta</math>),<br/><math>\eta = (IP - EA)/2)</math></i> | <i>softness<br/>(<math>S</math>),<br/><math>S = 1/\eta</math></i> | <i>electroph<br/>ilicity<br/>index</i><br>$(\omega)$ ,<br><br>$(\omega = \mu'^2 / 2\eta)$ |
|----------------------------------------|-------------------------------------------------------|-----------------------------------------------------|---------------------------------------------------------|------------------------------------------------------------------------|--------------------------------------------------------------------------------|-------------------------------------------------------------------|-------------------------------------------------------------------------------------------|
| <b>1</b>                               | 7.095                                                 | 1.229                                               | 4.162                                                   | -4.162                                                                 | 2.933                                                                          | 0.341                                                             | 2.953                                                                                     |
| <b>2</b>                               | 6.810                                                 | 1.156                                               | 3.983                                                   | -3.983                                                                 | 2.827                                                                          | 0.353                                                             | 2.805                                                                                     |
| <b>3</b>                               | 6.764                                                 | 1.182                                               | 3.973                                                   | -3.973                                                                 | 2.791                                                                          | 0.358                                                             | 2.827                                                                                     |
| <b>4</b>                               | 6.470                                                 | 1.112                                               | 3.791                                                   | -3.791                                                                 | 2.679                                                                          | 0.373                                                             | 2.682                                                                                     |
| <b>5</b>                               | 6.705                                                 | 1.407                                               | 4.056                                                   | -4.056                                                                 | 2.649                                                                          | 0.377                                                             | 3.105                                                                                     |

**Table 7: The computed Transition energy (E), maximum wavelength ( $\lambda$ ), oscillation strengths (f), and MO contribution of all considered systems in THF solvent.**

| <i>Compound<br/>s</i> | $\lambda$ (nm) | <i>E</i><br><br>$(eV)$ | <i>F</i><br><br>$(10^{-4})$ | <i>MO contribution</i> |                                  |
|-----------------------|----------------|------------------------|-----------------------------|------------------------|----------------------------------|
| <b>1</b>              | 253.71         | 4.88                   | 9                           | H -> L (66.34 %)       | H-2->L (28.74 %)                 |
| <b>2</b>              | 257.51         | 4.82                   | 4                           | H -> L (68.79%)        | H-2->L (14.28%)                  |
| <b>3</b>              | 259.05         | 4.79                   | 3                           | H -> L (66.34 %)       | H-2->L (20.90 %)                 |
| <b>4</b>              | 270.99         | 4.58                   | 0                           | H -> L (77.62 %)       | H-2->L (2.86 %)                  |
| <b>5</b>              | 270.40         | 4.59                   | 488                         | H -> L (81.09%)        | H-2->L+2(10.69 %) H-1->L (4.68%) |



**Table 8: The computed second-order perturbation energies ( $E_2$ ), the energy difference between donor and acceptor I and J orbitals ( $E(J)-E(I)$ ), and Fock matrix element ( $F(I, J)$ ) in the gas phase.**

| <i>Complex</i> | <i>Donor(i)</i> | <i>Type</i> | <i>Acceptor(j)</i> | <i>Type</i> | <i>E(2)</i> | <i>E(J)-E(I)</i> | <i>F(I,J)</i> |
|----------------|-----------------|-------------|--------------------|-------------|-------------|------------------|---------------|
| <i>C1</i>      | $\pi$           | C12-N13     | $\pi^*$            | C18-C20     | 17.34       | 0.34             | 0.071         |
|                | $\pi$           | C18-H19     | $\pi^*$            | S1-C18      | 0.51        | 0.28             | 0.056         |
|                | $\sigma$        | N13-C20     | $\sigma^*$         | N2-C12      | 7.42        | 1.14             | 0.083         |
|                | $\sigma$        | C18-H19     | $\sigma^*$         | S1-C18      | 0.51        | 0.78             | 0.018         |
|                | LP (2)          | S1          | $\pi^*$            | C18-C20     | 20.38       | 0.26             | 0.068         |
|                | LP(2)           | O3/O5       | $\pi^*$            | C12-N13     | 1.61        | 0.27             | 0.02          |
| <i>C2</i>      | $\pi$           | C12-N13     | $\pi^*$            | C18 - C19   | 15.77       | 0.35             | 0.069         |
|                | $\pi$           | S1-C12      | $\pi^*$            | N2 - C4     | 0.5         | 0.28             | 0.057         |
|                | $\sigma$        | N13-C19     | $\sigma^*$         | N 2 - C12   | 7.5         | 1.14             | 0.083         |
|                | $\sigma$        | C 6-C 9     | $\sigma^*$         | C 9 - H11   | 0.51        | 1.03             | 0.021         |
|                | LP(1)           | N2          | $\pi^*$            | O 3 - C17   | 43.42       | 0.29             | 0.104         |
|                | LP(2)           | O 3/O5      | $\pi^*$            | C12 - N13   | 1.58        | 0.27             | 0.019         |
| <i>C5</i>      | $\pi$           | C17-N27     | $\pi^*$            | C19 - C22   | 13.14       | 0.3              | 0.084         |
|                | $\pi$           | C19-C22     | $\pi^*$            | C17-N27     | 1.61        | 0.28             | 0.029         |
|                | $\sigma$        | N12-C18     | $\sigma^*$         | N 1 - C11   | 4.93        | 1.13             | 0.095         |
|                | $\sigma$        | C5-C8       | $\sigma^*$         | C 8 - H10   | 0.25        | 1.03             | 0.02          |
|                | LP ( 2)         | O2          | $\sigma^*$         | N 1 - C16   | 14.92       | 0.65             | 0.125         |
|                | LP*( 1)         | C 3         | $\sigma^*$         | C 8 - C13   | 0.44        | 0.5              | 0.03          |
|                | LP*( 1)         | C21         | $\pi^*$            | C19 - C22   | 14.49       | 0.13             | 0.085         |
|                | LP ( 2)         | O 2         | $\pi^*$            | C11 - N12   | 0.92        | 0.28             | 0.02          |
|                | LP ( 3)         | O2          | LP*( 1)            | C16         | 165.03      | 0.12             | 0.186         |
| LP ( 3)        | O4              | LP*( 1)     | C3                 | 165.03      | 0.12        | 0.186            |               |
| <i>C3</i>      | $\pi$           | C12-N13     | $\pi^*$            | C18 - C19   | 17.79       | 0.35             | 0.074         |
|                | $\pi$           | S1-C12      | $\pi^*$            | N2 - C4     | 0.58        | 0.28             | 0.054         |
|                | $\sigma$        | N13-C19     | $\sigma^*$         | N 2 - C12   | 7.04        | 1.14             | 0.081         |

|           |          |           |            |           |       |      |       |
|-----------|----------|-----------|------------|-----------|-------|------|-------|
|           | $\sigma$ | C 6 - C 9 | $\sigma^*$ | C 9 - H11 | 0.51  | 1.03 | 0.021 |
|           | LP ( 1)  | O 3       | $\sigma^*$ | N 2 - C17 | 1.05  | 1.06 | 0.03  |
|           | LP ( 1)  | N 2       | $\pi^*$    | O 3 - C17 | 43.38 | 0.29 | 0.104 |
|           | LP ( 1)  | N 2       | $\pi^*$    | O 3 - C17 | 43.38 | 0.29 | 0.104 |
|           | LP ( 2)  | S 1       | $\pi^*$    | C12 - N13 | 29.83 | 0.25 | 0.078 |
|           | LP ( 2)  | O 3       | $\pi^*$    | C12 - N13 | 1.6   | 0.27 | 0.02  |
| <b>C4</b> | $\pi$    | C12-N13   | $\pi^*$    | C18-C19   | 16.4  | 0.36 | 0.072 |
|           | $\pi$    | S1-C12    | $\pi^*$    | N2-C4     | 0.58  | 0.28 | 0.056 |
|           | $\sigma$ | N13-C19   | $\pi^*$    | N2-C12    | 7     | 1.14 | 0.08  |
|           | $\sigma$ | O3-C17    | $\pi^*$    | N2-C17    | 0.51  | 1.47 | 0.025 |
|           | LP(1)    | N2        | $\pi^*$    | O3-C17    | 43.59 | 0.29 | 0.104 |
|           | LP(2)    | O3        | $\pi^*$    | C12-N13   | 1.55  | 0.27 | 0.019 |

**Table 9: The computed Transition energy (E), maximum wavelength ( $\lambda$ ), oscillation /strengths (f), and MO contribution of all considered systems in the Gas Phase.**

| <i>Compound in gas phase</i> | <i>Band gap (eV)</i> | $\mu$ (D) | $a_0$ ( $10^{-24}$ esu) | $\Delta\alpha$ ( $10^{-2}$ esu) | $a$ ( $10^{-24}$ esu) | $\Delta\alpha$ ( $10^{-24}$ esu) | $\beta_{vec}$ ( $10^{-30}$ esu) | $\beta_{HRS}$ ( $10^{-30}$ esu) | $\beta(-w;w,0)$ ( $10^{-30}$ esu) | $\beta(-2w;w,0)$ SHG ( $10^{-30}$ esu) | $\gamma_0$ ( $10^{-36}$ esu) | $\gamma(-\omega;\omega,0,0)$ ( $10^{-36}$ esu) | $\gamma(-2\omega;\omega,\omega,0)$ ( $10^{-36}$ esu) |
|------------------------------|----------------------|-----------|-------------------------|---------------------------------|-----------------------|----------------------------------|---------------------------------|---------------------------------|-----------------------------------|----------------------------------------|------------------------------|------------------------------------------------|------------------------------------------------------|
| <b>1</b>                     | 5.87                 | 2.79      | 18.52                   | 6.43                            | 18.71                 | 6.53                             | 0.79                            | 0.21                            | 1.27                              | 1.37                                   | 14.24                        | 15.02                                          | 16.74                                                |
| <b>2</b>                     | 5.65                 | 2.28      | 20.67                   | 8.7                             | 20.89                 | 8.87                             | 1.55                            | 0.21                            | 2.02                              | 2.27                                   | 16.7                         | 17.68                                          | 19.84                                                |
| <b>3</b>                     | 5.58                 | 2.37      | 20.56                   | 6.8                             | 20.77                 | 6.9                              | 1.51                            | 0.39                            | 1.98                              | 2.16                                   | 16.21                        | 17.13                                          | 19.1                                                 |
| <b>4</b>                     | 5.36                 | 1.83      | 22.57                   | 8.52                            | 22.81                 | 8.67                             | 2.35                            | 0.6                             | 2.75                              | 3.11                                   | 18.58                        | 19.72                                          | 22.2                                                 |
| <b>5</b>                     | 5.30                 | 2.80      | 26.13                   | 15.54                           | 26.49                 | 15.97                            | 0.68                            | 0.18                            | 1.19                              | 1.44                                   | 22.76                        | 24.75                                          | 28.61                                                |

**Table 10: The computed Transition energy (E), maximum wavelength ( $\lambda$ ), oscillation /strengths (f), and MO contribution of all considered systems in THF solvent.**

| <i>Compound in THF</i> | <i>Band gap (eV)</i> | $\mu$ (D) | $a_0$ ( $10^{-24}$ esu) | $\Delta a$ ( $10^{-2}$ esu) | $a$ (-w,w) ( $10^{-24}$ esu) | $\Delta a$ ( $10^{-24}$ esu) | $b_0$ ( $10^{-30}$ esu) | $b_{HRS}$ ( $10^{-30}$ esu) | $b(-w;w,0)$ ( $10^{-30}$ esu) | $b(-2w;w,0)$ SHG ( $10^{-30}$ esu) | $\gamma_0$ ( $10^{-36}$ esu) | $\gamma(-\omega;\omega,0,0)$ ( $10^{-36}$ esu) | $\gamma(-2\omega;\omega,\omega,0)$ ( $10^{-36}$ esu) |
|------------------------|----------------------|-----------|-------------------------|-----------------------------|------------------------------|------------------------------|-------------------------|-----------------------------|-------------------------------|------------------------------------|------------------------------|------------------------------------------------|------------------------------------------------------|
| 1                      | 5.87                 | 3.77      | 23.38                   | 6.00                        | 20.8                         | 6.62                         | 0.92                    | 0.39                        | 1.59                          | 1.47                               | 26.39                        | 22.74                                          | 23.32                                                |
| 2                      | 5.65                 | 3.24      | 25.99                   | 8.12                        | 23.18                        | 8.99                         | 2.65                    | 0.12                        | 2.75                          | 2.79                               | 30.39                        | 26.56                                          | 27.27                                                |
| 3                      | 5.58                 | 3.18      | 25.88                   | 6.09                        | 23.06                        | 6.93                         | 2.59                    | 0.59                        | 2.71                          | 2.53                               | 29.86                        | 25.66                                          | 26.54                                                |
| 4                      | 5.36                 | 2.6       | 28.37                   | 7.89                        | 25.32                        | 8.82                         | 4.3                     | 1.03                        | 3.97                          | 3.98                               | 33.59                        | 29.32                                          | 30.43                                                |
| 5                      | 5.30                 | 3.47      | 33.44                   | 17.2                        | 29.68                        | 17.26                        | 0.73                    | 0.43                        | 1.58                          | 1.63                               | 45.76                        | 39.61                                          | 42.35                                                |
